# Supplementary material for: Costs-effectiveness and cost components of pharmaceutical and non-pharmaceutical interventions affecting antibiotic resistance outcomes in hospital patients: a systematic literature review
Source: PubMed Central journal article supplement (PMC10910705; doi:10.1136/bmjgh-2023-013205), 2024-02-29
Supplement: bmjgh-2023-013205supp001.pdf [file bmjgh-2023-013205supp001.pdf]

## SUPPLEMENTARY MATERIAL

### Costs-effectiveness and cost components of pharmaceutical and non-pharmaceutical interventions affecting antibiotic resistance outcomes in hospital patients: A systematic literature review

Kasim Allel\*, María José Hernández-Leal, Nichola Naylor, Eduardo A. Undurraga, Gerard Joseph Abou Jaoude, Priyanka Bhandari, Ellen Flanagan, Hassan Haghparast-Bidgoli, Koen B. Pouwels, Laith Yakob

#### Table of Contents

|                                                                                                                                                          |    |
|----------------------------------------------------------------------------------------------------------------------------------------------------------|----|
| <b>Table SM1:</b> Search strategy.....                                                                                                                   | 2  |
| <b>Table SM2:</b> Study inclusion and exclusion criteria.....                                                                                            | 3  |
| <b>Table SM3:</b> WHO global priority pathogens list of antibiotic-resistant bacteria.....                                                               | 4  |
| <b>Table SM4:</b> Final literature search strategy (search codes) in three search engines (12 <sup>th</sup> of December 2023).....                       | 5  |
| <b>Table SM5:</b> Drummond's checklist for assessing economic evaluations .....                                                                          | 7  |
| <b>Table SM6.</b> Reported cost-effectiveness per study (in 2022 USDs) and intervention type (pharmaceutical and non-pharmaceutical, N=59 studies) ..... | 9  |
| <b>Table SM7.</b> Characteristics of the included studies (n=59).....                                                                                    | 14 |
| <b>Table SM8.</b> Unit costs per study for pharmacological interventions (in 2022 USDs) .....                                                            | 17 |
| <b>Table SM9.</b> Unit costs per study for non-pharmaceutical interventions (in 2022 USDs) .....                                                         | 29 |
| <b>Table SM10:</b> Quality appraisal using Drummond's checklist.....                                                                                     | 37 |
| <b>Table SM11:</b> Prisma Checklist <sup>65</sup> .....                                                                                                  | 39 |
| <b>References</b> .....                                                                                                                                  | 43 |

† Supplementary file containing cost ingredients per study is located in [https://bit.ly/SR\\_amrCEingredients](https://bit.ly/SR_amrCEingredients).

\* **Corresponding author.** Institute for Global Health, 3rd floor, Institute of Child Health, 30 Guilford Street, London WC1N 1EH, email: [k.allel@ucl.ac.uk](mailto:k.allel@ucl.ac.uk)

**Table SM1:** Search strategy

|                          |                                                                                                                                                                                             |            |               |
|--------------------------|---------------------------------------------------------------------------------------------------------------------------------------------------------------------------------------------|------------|---------------|
| <b>Research question</b> | <b>What is the economic impact (cost-effectiveness) of pharmaceutical and non-pharmaceutical interventions for reducing AMR levels among critical pathogens within hospital inpatients?</b> |            |               |
| <b>Keywords</b>          | Economic evaluation                                                                                                                                                                         | Population | Antimicrobial |
| <b>Search terms</b>      | Economics                                                                                                                                                                                   | Hospital   | Antimicrobial |
|                          | Costs                                                                                                                                                                                       | Patient    | Microbial     |
|                          | Cost Analysis                                                                                                                                                                               | Inpatient  | Antibiotic    |
|                          | Fees and Charges                                                                                                                                                                            |            | +             |
|                          | Budgets                                                                                                                                                                                     |            |               |
|                          | Pharmacoeconomic                                                                                                                                                                            |            | Resistance    |
|                          | Expenditure                                                                                                                                                                                 |            |               |
|                          | Finance                                                                                                                                                                                     |            |               |

**Table SM2:** Study inclusion and exclusion criteria

| <b>Criteria</b>             | <b>Inclusion Criteria</b>                                                                                                                                               | <b>Exclusion Criteria</b>                                                                                                           |
|-----------------------------|-------------------------------------------------------------------------------------------------------------------------------------------------------------------------|-------------------------------------------------------------------------------------------------------------------------------------|
| <b>Population</b>           | Hospitalised patients, no age restrictions                                                                                                                              | Patients outside hospital                                                                                                           |
| <b>Geography</b>            | All countries                                                                                                                                                           | None                                                                                                                                |
| <b>Period</b>               | Until December 2023                                                                                                                                                     | After December 2023                                                                                                                 |
| <b>Setting</b>              | Inpatients care setting, hospital infections, nosocomial infections (infections occurring within the hospital)                                                          | Nursing home, long-term care studies, community settings.                                                                           |
| <b>Interventions</b>        | Pharmaceutical or non-pharmaceutical interventions targeting infections from the WHO critical and high-priority AMR bacterial pathogens only                            | All other interventions or pathogens.                                                                                               |
| <b>Outcomes</b>             | Studies must have at least an incremental cost-effectiveness measure, e.g., dollars per QALY gained, however, other measures were included ,e.g. cost per patient cured | All other outcomes (non-incremental cost per gain in hospital outcomes).                                                            |
| <b>Publication language</b> | All languages                                                                                                                                                           | None                                                                                                                                |
| <b>Publication Type</b>     | Peer-reviewed articles                                                                                                                                                  | Conference proceedings, case reports, grey literature, magazine entries, protocols, literature reviews, commentaries, and abstracts |
| <b>Study design</b>         | Cost-effectiveness analyses, cost-utility analyses, cost-benefit analyses, piggyback economic evaluation alongside RCTs, case reports                                   | All other study designs (e.g., literature review,; systematic reviews; meta-analyses not using primary data)                        |

Notes: QALY: quality-adjusted life year. RCT= randomised controlled trial.

**Table SM3:** WHO global priority pathogens list of antibiotic-resistant bacteria

| <b>Priority 1: CRITICAL</b>                                                                                                                                                                                                                                                                                                                                                                                                                                                                       |
|---------------------------------------------------------------------------------------------------------------------------------------------------------------------------------------------------------------------------------------------------------------------------------------------------------------------------------------------------------------------------------------------------------------------------------------------------------------------------------------------------|
| <ul style="list-style-type: none"> <li>• <i>Acinetobacter baumannii</i>, carbapenem-resistant</li> <li>• <i>Pseudomonas aeruginosa</i>, carbapenem-resistant</li> <li>• <i>Enterobacteriaceae</i>, carbapenem-resistant, ESBL-producing</li> </ul>                                                                                                                                                                                                                                                |
| <b>Priority 2: HIGH</b>                                                                                                                                                                                                                                                                                                                                                                                                                                                                           |
| <ul style="list-style-type: none"> <li>• <i>Enterococcus faecium</i>, vancomycin-resistant</li> <li>• <i>Staphylococcus aureus</i>, methicillin-resistant, vancomycin-intermediate, and resistant</li> <li>• <i>Helicobacter pylori</i>, clarithromycin-resistant</li> <li>• <i>Campylobacter spp.</i>, fluoroquinolone-resistant</li> <li>• <i>Salmonellae</i>, fluoroquinolone-resistant</li> <li>• <i>Neisseria gonorrhoeae</i>, cephalosporin-resistant, fluoroquinolone-resistant</li> </ul> |
| <b>Priority 3: MEDIUM</b>                                                                                                                                                                                                                                                                                                                                                                                                                                                                         |
| <ul style="list-style-type: none"> <li>• <i>Streptococcus pneumoniae</i>, penicillin-non-susceptible</li> <li>• <i>Haemophilus influenzae</i>, ampicillin-resistant</li> <li>• <i>Shigella spp.</i>, fluoroquinolone-resistant</li> </ul>                                                                                                                                                                                                                                                         |

Notes: Adapted from the World Health Organization 'WHO' priority pathogen report[1].

**Table SM4:** Final literature search strategy (search codes) in three search engines (12<sup>th</sup> of December 2023)

|                                                                                                                                                                                                                                                                                                                                                                                                                                                                                                                                                                                                                                                                                                                                                                                                                                                                                                                                                                                                                                                                                                                                                                                                                                                                                                                                                                                                                                                                                                                                                                                                                                                                                                                                                                                                                                                                                                                                                                                                                                                                                                                                                                 |
|-----------------------------------------------------------------------------------------------------------------------------------------------------------------------------------------------------------------------------------------------------------------------------------------------------------------------------------------------------------------------------------------------------------------------------------------------------------------------------------------------------------------------------------------------------------------------------------------------------------------------------------------------------------------------------------------------------------------------------------------------------------------------------------------------------------------------------------------------------------------------------------------------------------------------------------------------------------------------------------------------------------------------------------------------------------------------------------------------------------------------------------------------------------------------------------------------------------------------------------------------------------------------------------------------------------------------------------------------------------------------------------------------------------------------------------------------------------------------------------------------------------------------------------------------------------------------------------------------------------------------------------------------------------------------------------------------------------------------------------------------------------------------------------------------------------------------------------------------------------------------------------------------------------------------------------------------------------------------------------------------------------------------------------------------------------------------------------------------------------------------------------------------------------------|
| <b>I. PubMed</b>                                                                                                                                                                                                                                                                                                                                                                                                                                                                                                                                                                                                                                                                                                                                                                                                                                                                                                                                                                                                                                                                                                                                                                                                                                                                                                                                                                                                                                                                                                                                                                                                                                                                                                                                                                                                                                                                                                                                                                                                                                                                                                                                                |
| <p>('Economic' OR 'Budget' OR 'cost' OR 'cost analysis' OR 'pharmacoeconomic' OR 'pharmaco-economic' OR 'economic evaluation' OR 'economic analysis' OR 'economic modelling' OR 'cost utility' OR 'cost minimi*' OR 'cost' OR 'cost saving' OR 'cost-saving' OR 'cost allocation' OR 'expenditure' OR 'expense' OR 'financ*' OR 'healthcare cost' OR 'unit cost' OR 'money' OR 'monetary' OR 'cost-effectiv*' OR 'cost-benefit') AND ('Drug resistance' OR 'antimicrobial drug resist*' OR 'drug resist*' OR 'antibiotic resist*' OR 'antimicrobial resist*' OR 'multi-drug resist*' OR 'drug-resistance' OR 'carbapenem-resistant Escherichia coli' OR 'carbapenem-resistant Klebsiella pneumoniae' OR 'cephalosporin-resistant Escherichia coli' OR 'cephalosporin-resistant Klebsiella pneumoniae' OR 'carbapenem-resistant Enterobacter*' OR 'carbapenem-resistant Enterobacteriaceae' OR 'cephalosporin-resistant Enterobacter*' OR 'cephalosporin-resistant Enterobacteriaceae' OR 'Penicillin-resistant Streptococcus pneumoniae' OR 'vancomycin-resistant Staphylococcus aureus' OR 'methicillin-resistant Staphylococcus aureus' OR 'carbapenem-resistant Pseudomonas aeruginosa' OR 'carbapenem-resistant Acinetobacter baumannii' OR 'vancomycin-resistant Enterococcus' OR 'vancomycin-resistant Enterococcus faecium' OR 'clarithromycin-resistant Helicobacter pylori' OR 'fluoroquinolone-resistant Campylobacter' OR 'fluoroquinolone-resistant Salmonella' OR 'fluoroquinolone-resistant Neisseria gonorrhoeae' OR 'cephalosporin-resistant Neisseria gonorrhoeae' OR 'fluoroquinolone-resistant Shigella' OR 'ampicillin-resistant Haemophilus influenzae') AND ('hospital' OR 'inpatient' OR 'patient' OR 'healthcare' OR 'ICU' OR 'intensive care unit' OR 'ward' OR 'clinic' OR 'medical' OR 'nursing') NOT ('HIV' OR 'Tuberculosis' OR 'TB' OR 'virus' OR 'fungus' OR 'fungal' OR 'conference' OR 'letter to the editor' )</p>                                                                                                                                                                                                            |
| <b>II. EMBASE</b>                                                                                                                                                                                                                                                                                                                                                                                                                                                                                                                                                                                                                                                                                                                                                                                                                                                                                                                                                                                                                                                                                                                                                                                                                                                                                                                                                                                                                                                                                                                                                                                                                                                                                                                                                                                                                                                                                                                                                                                                                                                                                                                                               |
| <p>((('Economic' or 'Budget' or 'cost' or 'cost analysis' or 'pharmacoeconomic' or 'pharmaco-economic' or 'economic evaluation' or 'economic analysis' or 'economic modelling' or 'cost utility' or 'cost minimi*' or 'cost' or 'cost saving' or 'cost-saving' or 'cost allocation' or 'expenditure' or 'expense' or 'financ*' or 'healthcare cost' or 'unit cost' or 'money' or 'monetary' or 'cost-effectiv*' or 'cost-benefit') and ('Drug resistance' or 'antimicrobial drug resist*' or 'drug resist*' or 'antibiotic resist*' or 'antimicrobial resist*' or 'multi-drug resist*' or 'drug-resistance' or 'carbapenem-resistant Escherichia coli' or 'carbapenem-resistant Klebsiella pneumoniae' or 'cephalosporin-resistant Escherichia coli' or 'cephalosporin-resistant Klebsiella pneumoniae' or 'carbapenem-resistant Enterobacter*' or 'carbapenem-resistant Enterobacteriaceae' or 'cephalosporin-resistant Enterobacter*' or 'cephalosporin-resistant Enterobacteriaceae' or 'Penicillin-resistant Streptococcus pneumoniae' or 'vancomycin-resistant Staphylococcus aureus' or 'methicillin-resistant Staphylococcus aureus' or 'carbapenem-resistant Pseudomonas aeruginosa' or 'carbapenem-resistant Acinetobacter baumannii' or 'vancomycin-resistant Enterococcus' or 'vancomycin-resistant Enterococcus faecium' or 'clarithromycin-resistant Helicobacter pylori' or 'fluoroquinolone-resistant Campylobacter' or 'fluoroquinolone-resistant Salmonella' or 'fluoroquinolone-resistant Neisseria gonorrhoeae' or 'cephalosporin-resistant Neisseria gonorrhoeae' or 'fluoroquinolone-resistant Shigella' or 'ampicillin-resistant Haemophilus influenzae') and ('hospital' or 'inpatient' or 'patient' or 'healthcare' or 'ICU' or 'intensive care unit' or 'ward' or 'clinic' or 'medical' or 'nursing')) not ('HIV' or 'Tuberculosis' or 'TB' or 'virus' or 'fungus' or 'fungal' or 'conference' or 'letter to the editor')).mp. [mp=title, abstract, heading word, drug trade name, original title, device manufacturer, drug manufacturer, device trade name, keyword heading word, floating subheading word, candidate term word]</p> |

**III. Econlit**

('Economic Development' OR 'Model' OR 'Economic' OR 'fee' OR 'charge' OR 'Budget' OR 'cost' OR 'cost analysis' OR 'pharmacoeconomic' OR 'pharmaco-economic' OR 'pricing' OR 'economic evaluation' OR 'economic analysis' OR 'economic modelling' OR 'cost utility' OR 'cost minimi\*' OR 'cost' OR 'cost saving' OR 'cost allocation' OR 'expenditure' OR 'expense' OR 'finance\*' OR 'healthcare cost' OR 'unit cost' OR 'money' OR 'monetary') AND ('Drug resistance' OR 'antimicrobial drug resistan\*' OR 'drug resistan\*' OR 'antibiotic resistan\*' OR 'antimicrobial resistan\*' OR 'multi-drug resistan\*' OR 'drug-resistance' OR 'carbapenem-resistant Escherichia coli' OR 'carbapenem-resistant Klebsiella pneumoniae' OR 'cephalosporin-resistant Escherichia coli' OR 'cephalosporin-resistant Klebsiella pneumoniae' OR 'carbapenem-resistant Enterobacter\*' OR 'carbapenem-resistant Enterobacteriaceae' OR 'cephalosporin-resistant Enterobacter\*' OR 'cephalosporin-resistant Enterobacteriaceae' OR 'Penicillin-resistant Streptococcus pneumoniae' OR 'vancomycin-resistant Staphylococcus aureus' OR 'methicillin-resistant Staphylococcus aureus' OR 'carbapenem-resistant Pseudomonas aeruginosa' OR 'carbapenem-resistant Acinetobacter baumannii' OR 'vancomycin-resistant Enterococcus' OR 'vancomycin-resistant Enterococcus faecium' OR 'clarithromycin-resistant Helicobacter pylori' OR 'fluoroquinolone-resistant Campylobacter' OR 'fluoroquinolone-resistant Salmonella' OR 'fluoroquinolone-resistant Neisseria gonorrhoeae' OR 'cephalosporin-resistant Neisseria gonorrhoeae' OR 'fluoroquinolone-resistant Shigella' OR 'ampicillin-resistant Haemophilus influenzae') AND ('hospital' OR 'inpatient' OR 'patient' OR 'healthcare' OR 'ICU' OR 'intensive care unit' OR 'ward' OR 'clinic' OR 'medical' OR 'nursing')

**Table SM5: Drummond's checklist for assessing economic evaluations**

---

**1. Was a well-defined question posed in answerable form?**

---

- 1.1. Did the study examine both costs and effects of the service(s) or programme(s)?
  - 1.2. Did the study involve a comparison of alternatives?
  - 1.3. Was a viewpoint for the analysis stated, and was the study placed in any particular decision-making context?
- 

**2. Was a comprehensive description of the competing alternatives given (i.e., can you tell who did what to whom, where, and how often)?**

---

- 2.1. Were there any important alternatives omitted?
  - 2.2. Was (should) a do-nothing alternative be considered?
- 

**3. Was the effectiveness of the programme or services established?**

---

- 3.1. Was this done through a randomised, controlled clinical trial? If so, did the trial protocol reflect what would happen in regular practice?
  - 3.2. Was effectiveness established through an overview of clinical studies?
  - 3.3. Were observational data or assumptions used to establish effectiveness? If so, what are the potential biases in results?
- 

**4. Were all the important and relevant costs and consequences for each alternative identified?**

---

- 4.1. Was the range wide enough for the research question at hand?
  - 4.2. Did it cover all relevant viewpoints? (Possible viewpoints include the community or social viewpoint, and those of patients and third-party payers. Other viewpoints may also be relevant depending upon the particular analysis.)
  - 4.3. Were the capital costs, as well as operating costs, included?
- 

**5. Were costs and consequences measured accurately in appropriate physical units (e.g., hours of nursing time, number of physician visits, lost work days, gained life years)?**

---

- 5.1. Were any of the identified items omitted from measurement? If so, does this mean they carried no weight in the subsequent analysis?
  - 5.2. Were there special circumstances (e.g., joint use of resources) that made measurement difficult? Were these circumstances handled appropriately?
- 

**6. Were the cost and consequences valued credibly?**

---

- 6.1. Were the sources of all values clearly identified? (Possible sources include market values, patient or client preferences and views, policy-makers views, and health professionals' judgements)
  - 6.2. Were market values employed for changes involving resources gained or depleted?
  - 6.3. Where market values were absent (e.g., volunteer labour), or market values did not reflect actual values (such as clinic space donated at a reduced rate), were adjustments made to approximate market values?
  - 6.4. Was the valuation of consequences appropriate for the question posed (i.e., has the appropriate type or types of analysis – cost-effectiveness, cost-benefit, cost-utility – been selected)?
- 

**7. Were costs and consequences adjusted for differential timing?**

---

---

7.1. Were costs and consequences that occur in the future ‘discounted’ to their present values?

7.2. Was there any justification given for the discount rate used?

---

**8. Was an incremental analysis of costs and consequences of alternatives performed?**

---

8.1. Were the additional (incremental) costs generated by one alternative over another compared to the additional effects, benefits, or utilities generated?

---

**9. Was allowance made for uncertainty in the estimates of costs and consequences?**

---

9.1. If data on costs and consequences were stochastic (randomly determined sequence of observations), were appropriate statistical analyses performed?

9.2. If a sensitivity analysis was employed, was justification provided for the range of values (or key study parameters)?

9.3. Were the study results sensitive to changes in the values (within the assumed range for sensitivity analysis, or within the confidence interval around the ratio of costs to consequences)?

---

**10. Did the presentation and discussion of study results include all issues of concern to users?**

---

10.1. Were the conclusions of the analysis based on some overall index or ratio of costs to consequences (e.g., cost-effectiveness ratio)? If so, was the index interpreted intelligently or in a mechanistic fashion?

10.2. Were the results compared with those of others who have investigated the same question? If so, were allowances made for potential differences in study methodology?

10.3. Did the study discuss the generalisability of the results to other settings and patient/client groups?

10.4. Did the study allude to, or take account of, other important factors in the choice or decision under consideration (e.g., distribution of costs and consequences, or relevant ethical issues)?

10.5. Did the study discuss implementation issues, such as the feasibility of adopting the ‘preferred’ programme given existing financial or other constraints, and whether any freed resources could be redeployed to other worthwhile programmes?

---

Notes: Drummond, et al. 2015 [2].



**Table SM6.** Reported cost-effectiveness per study (in 2022 USDs) and intervention type (pharmaceutical and non-pharmaceutical, N=59 studies)

| First author                                           | Year | Country | Pathogen | Hospital population | Strategy                                                                                                                                   | ICER                                                                                   |
|--------------------------------------------------------|------|---------|----------|---------------------|--------------------------------------------------------------------------------------------------------------------------------------------|----------------------------------------------------------------------------------------|
| <b>I. Pharmaceutical interventions (N= 32 studies)</b> |      |         |          |                     |                                                                                                                                            |                                                                                        |
| Bianchini[3]                                           | 2022 | USA     | CRO      | All                 | New beta-lactam beta-lactamase Inhibitor antibiotics <sup>‡</sup> vs. colistin treatment                                                   | \$3,900/QALY.                                                                          |
| Bolaños-Díaz[4]                                        | 2022 | PER     | CRE      | BSI and Pneumonia   | Ceftazidime avibactam <sup>‡</sup> vs. colistin-based treatment.                                                                           | \$6,947/QALY.                                                                          |
| Bounthavong[5]                                         | 2009 | USA     | MRSA     | cSSSI               | Linezolid <sup>‡</sup> vs. vancomycin treatment.                                                                                           | Dominant strategy (\$/cure).                                                           |
| Bounthavong[6]                                         | 2011 | USA     | MRSA     | cSSSI               | [a] Linezolid <sup>‡</sup> vs. vancomycin treatment.<br>[b] Linezolid <sup>‡</sup> vs. daptomycin treatment.                               | Dominant strategy (\$/treatment success).<br>Dominant strategy (\$/treatment success). |
| Cara[7]                                                | 2018 | KSA     | MDR GN   | Pneumonia           | Low dose of colistin <sup>*</sup> vs. high dose of colistin treatment.                                                                     | \$1,006/nephrotoxicity avoided.                                                        |
| Collins[8]                                             | 2015 | USA     | MRSA     | Pneumonia           | Linezolid <sup>‡</sup> vs. vancomycin treatment.                                                                                           | \$7,527/QALY and \$84,823/life saved                                                   |
| De Cock[9]                                             | 2009 | FRA     | MRSA     | cSSSI               | Linezolid <sup>‡</sup> vs. vancomycin treatment.                                                                                           | Dominant strategy (\$/cure & \$/death averted).                                        |
| De Cock[10]                                            | 2009 | DEU     | MRSA     | Pneumonia           | Linezolid <sup>‡</sup> vs. vancomycin treatment.                                                                                           | \$9,223/cure; \$6,076/death averted; \$345/LY.                                         |
| Goudarzi[11]                                           | 2023 | IRN     | CRE      | All                 | Ceftazidime avibactam <sup>‡</sup> vs. colistin treatment.                                                                                 | \$798/QALY.                                                                            |
| Gutierrez[12]                                          | 2021 | CHL     | CRE      | All                 | Ceftazidime/avibactam <sup>‡</sup> vs. colistin+ meropenem treatment.                                                                      | \$1,340/QALY and \$1,342/LY                                                            |
| Kong[13]                                               | 2023 | CHN     | CRE      | BSI                 | [a] Ceftazidime-avibactam <sup>‡</sup> vs. polymyxin B (PMB) monotherapy.<br>[b] Ceftazidime-avibactam <sup>‡</sup> vs. PMB-based therapy. | Dominant strategy (\$/QALY).<br>\$639/QALY.                                            |
| Laohavaleeson[14]                                      | 2008 | USA     | MRSA     | cSSSI               | Telavancin <sup>‡</sup> vs. vancomycin treatment.                                                                                          | Dominant strategy (\$/cure).                                                           |
| Lin[15]                                                | 2016 | TWN     | MRSA     | Pneumonia           | Linezolid <sup>‡</sup> vs. vancomycin treatment.                                                                                           | \$4,224/cure.                                                                          |
| McKinnon[16]                                           | 2006 | USA     | MRSA     | cSSSI               | Linezolid <sup>‡</sup> vs. vancomycin treatment.                                                                                           | Dominant strategy (\$/% cure rate).                                                    |
| Mennini[17]                                            | 2021 | ITA     | CRE      | All                 | Vaborem (meropenem-vaborbactam) <sup>‡</sup> versus best available treatment.                                                              | \$9,548/LY and \$11,813/QALY.                                                          |
| Mullins[18]                                            | 2022 | USA     | MRSA     | Pneumonia           | Linezolid <sup>‡</sup> vs. vancomycin treatment.                                                                                           | \$5,726/life saved.                                                                    |
| Niederman[19]                                          | 2014 | USA     | MRSA     | Pneumonia           | Linezolid <sup>‡</sup> vs. vancomycin treatment.                                                                                           | \$21,488/treatment success.                                                            |
| Patel[20]                                              | 2014 | DEU     | MRSA     | Pneumonia           | Linezolid <sup>‡</sup> vs. vancomycin treatment.                                                                                           | Dominant strategy (\$/treatment success).                                              |
| Patel[21]                                              | 2014 | USA     | MRSA     | Pneumonia           | Linezolid <sup>‡</sup> vs. vancomycin treatment.                                                                                           | Dominant strategy (\$/treatment success).                                              |
| Prabhu[22]                                             | 2017 | GBR     | ABR GN   | IAI                 | Ceftolozane/tazobactam/ metronidazole <sup>‡</sup> vs. piperacillin/tazobactam treatment.                                                  | \$8,551/QALY.                                                                          |
| Rubio-Terres[23]                                       | 2012 | ESP     | MRSA     | All                 | Daptomycin <sup>‡</sup> vs. vancomycin treatment.                                                                                          | Dominant strategy (\$/cure).                                                           |

|                                                             |      |          |       |                   |                                                                                                                                                                                                                                                                                                                                                             |                                                                                                                                                     |
|-------------------------------------------------------------|------|----------|-------|-------------------|-------------------------------------------------------------------------------------------------------------------------------------------------------------------------------------------------------------------------------------------------------------------------------------------------------------------------------------------------------------|-----------------------------------------------------------------------------------------------------------------------------------------------------|
| Salas[24]                                                   | 2016 | ESP      | MRSA  | Post-surgery      | Intense mupirocin treatment among MRSA colonised patients* vs. conventional mupirocin treatment.                                                                                                                                                                                                                                                            | \$44,552/infection averted.                                                                                                                         |
| Schurmann[25]                                               | 2009 | DEU      | MRSA  | cSSSI             | Linezolid* vs. vancomycin treatment.                                                                                                                                                                                                                                                                                                                        | Dominant strategy (\$/cure).                                                                                                                        |
| Simon[26]                                                   | 2019 | USA      | CRE   | BSI and Pneumonia | Ceftazidime-avibactam* vs. colistin-based treatment.                                                                                                                                                                                                                                                                                                        | \$113,423/QALY.                                                                                                                                     |
| Tan[27]                                                     | 2014 | CHN      | MRSA  | Pneumonia         | Linezolid* vs. vancomycin treatment calibrated to different cities.                                                                                                                                                                                                                                                                                         | Up to \$3,312/ treatment success.                                                                                                                   |
| Varon[28]                                                   | 2014 | COL      | MRSA  | Pneumonia         | Linezolid* vs. vancomycin treatment.                                                                                                                                                                                                                                                                                                                        | \$3,179/cure.                                                                                                                                       |
| Varon-Vega[29]                                              | 2022 | COL      | CRE   | Pneumonia         | Ceftazidime-avibactam* vs. colistin-meropenem treatment.                                                                                                                                                                                                                                                                                                    | \$3,797/QALY.                                                                                                                                       |
| Vlachaki[30]                                                | 2022 | GBR      | CRE   | All               | Vaborem (meropenem-vaborbactam)* versus best available treatment.                                                                                                                                                                                                                                                                                           | \$20,486/QALY.                                                                                                                                      |
| Vu[31]                                                      | 2021 | USA      | MRSA  | BSI               | [a] Linezolid* vs. vancomycin 4-weeks treatment.<br><br>[b] Daptomycin* vs. linezolid 4-weeks treatment.<br><br>[c] Linezolid* vs. ceftaroline/daptomycin 4-weeks treatment.                                                                                                                                                                                | Dominant strategy (\$/treatment failure avoided).<br>\$14,881/treatment failure avoided.<br><br>Dominant strategy (\$/treatment failure avoided).   |
| Von Dach[32]                                                | 2017 | CHE      | MRSA  | All               | Trimethoprim-sulfamethoxazole + rifampicin* vs. linezolid.                                                                                                                                                                                                                                                                                                  | Dominant strategy(\$/QALY).                                                                                                                         |
| Wan[33]                                                     | 2016 | CHN      | MRSA  | Pneumonia         | Linezolid* vs. vancomycin treatment calibrated to different cities.                                                                                                                                                                                                                                                                                         | Up to \$3,984/ treatment success.                                                                                                                   |
| Yang[34, 35]                                                | 2022 | USA      | CR-GN | All               | Imipenem/cilastatin/relebactam* vs. colistin/imipenem treatment.                                                                                                                                                                                                                                                                                            | Dominant strategy (\$/QALY).                                                                                                                        |
| <b>II. Non-pharmaceutical interventions (N= 27 studies)</b> |      |          |       |                   |                                                                                                                                                                                                                                                                                                                                                             |                                                                                                                                                     |
| Brown[36]                                                   | 2010 | EU & USA | MRSA  | All               | Rapid PCR testing* vs. empiric vancomycin treatment.                                                                                                                                                                                                                                                                                                        | \$55 (EU) and \$39 (USA) /LY.                                                                                                                       |
| Cho[37]                                                     | 2019 | KOR      | CLRHP | All               | DPO-based multiplex PCR therapy* vs. conventional therapy.                                                                                                                                                                                                                                                                                                  | \$5/case eradicated.                                                                                                                                |
| Dymond[38]                                                  | 2020 | GBR      | MRSA  | All               | Whole genome sequencing* vs. standard infection control.                                                                                                                                                                                                                                                                                                    | Dominant strategy (\$/QALY).                                                                                                                        |
| Gidengil[39]                                                | 2015 | USA      | MRSA  | ICU               | [a] Universal decolonisation* vs. standard infection control.<br><br>[b] Universal contact precautions + decolonisation* vs. universal decolonisation.                                                                                                                                                                                                      | Dominant strategy (\$/colonisation or death averted).<br><br>\$3,102/ colonisation averted and \$11,316/ infection averted.                         |
| Ho[40]                                                      | 2016 | HKG      | CRE   | Surgical ICU      | Active surveillance (PCR) + isolation of CRE+* vs. no surveillance.                                                                                                                                                                                                                                                                                         | \$100/QALY.                                                                                                                                         |
| Hubben[41]                                                  | 2011 | USA      | MRSA  | All               | [a][b] Selective chromogenic-based screening in high and medium prevalence settings* vs. do nothing.<br><br>[c][d] Selective PCR-based tests in high and medium prevalence settings* vs. selective chromogenic-based screening.<br><br>[e][f] Universal screening with PCR-based tests in high and medium prevalence settings* vs. selective PCR-based test | \$5,787 and \$14,538/ case averted, respectively.<br><br>\$18,349 and \$51,095 per case averted, respectively.<br><br>\$184,902 and \$328,448/ case |

|                   |      |     |      |              |                                                                                                                                                                                                                                                                              |                                                                         |
|-------------------|------|-----|------|--------------|------------------------------------------------------------------------------------------------------------------------------------------------------------------------------------------------------------------------------------------------------------------------------|-------------------------------------------------------------------------|
| Jayaraman[42]     | 2016 | USA | MDR  | ICU          | Proactive infection control program (enhanced hand hygiene, cleaning wards, increased nurse-to-patient ratio, and replacement of all disposable supplies) <sup>‡</sup> vs. standard of care.                                                                                 | averted, respectively.<br>\$4,949/transmission averted.                 |
| Kang[43]          | 2012 | USA | MRSA | All          | PCR-universal screening surveillance <sup>‡</sup> vs. no surveillance.                                                                                                                                                                                                       | \$20,401/detected case.                                                 |
| Lapointe-Shaw[44] | 2017 | USA | CRE  | All          | Universal screening surveillance (PCR/culture) <sup>‡</sup> vs. no surveillance                                                                                                                                                                                              | \$32,049/QALY.                                                          |
| Lee[45]           | 2005 | USA | VRE  | All          | Screening utilising current standards plus those patients with hospitalisations in previous 2-years <sup>‡</sup> vs. current standards.                                                                                                                                      | Dominant strategy (\$/death averted)                                    |
| Lee[46]           | 2009 | USA | MRSA | Surgery      | [a] Universal preoperative screening (culture of a single anterior nares sample) <sup>‡</sup> vs. do nothing at MRSA prevalence of 0.1 in a single location.                                                                                                                 | \$2,452/QALY.                                                           |
| Lee[47]           | 2010 | USA | MRSA | All          | [b] Universal preoperative screening (culture of a single anterior nares sample) <sup>‡</sup> vs. doing nothing at MRSA prevalence >0.1 in a single location. Universal screening surveillance (culture of a single anterior nares sample) <sup>‡</sup> vs. no surveillance. | Dominant strategy (\$/QALY).<br>\$14,766/QALY.                          |
| Lin[48]           | 2021 | USA | CRE  | All          | Screening surveillance schemes using electronic registry (state-wide and hospital records) <sup>‡</sup> vs. doing nothing scenario.                                                                                                                                          | \$27,000/ infection averted                                             |
| Luangasanatip[49] | 2018 | THA | MRSA | BSI, ICU     | [a] Hand hygiene intervention to improve compliance at 20%, 30% and 40% <sup>‡</sup> vs. hand hygiene compliance at 10% in paediatric ICU.                                                                                                                                   | \$1,160, \$806, and \$739/QALY.                                         |
| Mac[50]           | 2019 | CAN | VRE  | General ward | [b] Hand hygiene intervention to improve compliance at 20%, 30% and 40% <sup>‡</sup> vs. hand hygiene compliance at 10% in adult ICU.                                                                                                                                        | \$835, \$574, and \$524/QALY.                                           |
| Murthy[51]        | 2010 | CHE | MRSA | Surgery      | Screening (swabs and culture) and isolation <sup>‡</sup> , compared to no screening or isolation.                                                                                                                                                                            | \$9,372/QALY.                                                           |
| Nelson[52]        | 2010 | USA | MRSA | All          | [a] PCR screening at admission <sup>‡</sup> vs. no screening.                                                                                                                                                                                                                | \$38,111/infection avoided.                                             |
| Nelson[53]        | 2016 | USA | MRSA | HAI          | [b] PCR screening at admission <sup>‡</sup> vs. screening for risk factors + isolation.                                                                                                                                                                                      | Dominant strategy (\$/infection avoided).                               |
|                   |      |     |      |              | [a] Active surveillance (PCR screening) <sup>‡</sup> + decolonization <sup>‡</sup> vs. active surveillance alone.                                                                                                                                                            | Dominant strategy (\$/infections or deaths avoided).                    |
|                   |      |     |      |              | [b] Active surveillance (PCR screening) + decolonization <sup>‡</sup> vs. no surveillance.                                                                                                                                                                                   | Dominant strategy (\$/infections or deaths avoided).                    |
|                   |      |     |      |              | [a][b] 3-year hospital surveillance initiative including screening, contact precautions, improved hand hygiene and infection control <sup>‡</sup> vs. no initiative.                                                                                                         | Between \$34,201 and \$64,436/LY, subject to high and low transmission. |

|                 |      |        |              |             |                                                                                                                                                                                                                          |                                                                                     |
|-----------------|------|--------|--------------|-------------|--------------------------------------------------------------------------------------------------------------------------------------------------------------------------------------------------------------------------|-------------------------------------------------------------------------------------|
| Nelson[54]      | 2021 | USA    | MRSA and VRE | HAI         | [a][b] 3-year hospital surveillance initiative including screening, contact precautions, improved hand hygiene and infection control <sup>‡</sup> vs. no initiative.                                                     | Between \$13,904 and \$44,270/LY, subject to high and low transmission              |
| Penno[55]       | 2015 | Africa | PRSP         | BSI         | Evidence-based antimicrobial surveillance using local data and blood cultures <sup>‡</sup> vs. generic antimicrobial management                                                                                          | \$3,531/life saved.                                                                 |
| Puzniak[56]     | 2004 | USA    | VRE          | ICU         | Use of gown and gloves <sup>‡</sup> vs. gloves alone on entry to patient rooms.                                                                                                                                          | \$2,939/case averted.                                                               |
| Robotham[57]    | 2011 | GBR    | MRSA         | ICU         | [a] Universal chromogenic agar screening and decolonisation with mupirocin <sup>‡</sup> vs. do nothing.                                                                                                                  | Dominant strategy (\$/QALY).                                                        |
|                 |      |        |              |             | [b] Universal PCR and decolonisation with mupirocin <sup>‡</sup> vs. do nothing.                                                                                                                                         | \$11,005/QALY.                                                                      |
|                 |      |        |              |             | [c] Chromogenic agar screening for high-risk patients and isolation of MRSA <sup>+‡</sup> vs. do nothing.                                                                                                                | \$8,114/QALY                                                                        |
|                 |      |        |              |             | [d] PCR for high-risk patients and isolation of MRSA <sup>+‡</sup> vs do nothing.                                                                                                                                        | \$74,114/QALY.                                                                      |
|                 |      |        |              |             | [e] Universal PCR and isolation of MRSA <sup>+‡</sup> vs. do nothing.                                                                                                                                                    | \$80,159/QALY                                                                       |
|                 |      |        |              |             | [f] Universal pre-emptive isolation <sup>‡</sup> vs. do nothing.                                                                                                                                                         | \$246,302/QALY.                                                                     |
| Robotham[58]    | 2016 | GBR    | MRSA         | All         | Screening strategies using a chromogenic agar test at hospital admission (checklist-activated screening, high-risk specialty-based screening) accompanied by decolonisation and isolation <sup>‡</sup> vs. no screening. | Dominated strategy (\$/QALY).                                                       |
| Voermans[59]    | 2019 | USA    | ABR          | Sepsis/LRTI | (PCT)-guided decision algorithm to guide antibiotic prescription <sup>‡</sup> vs. standard of care.                                                                                                                      | Dominant strategy (\$/patient diagnosed with ABR bacteria avoided).                 |
| You[60]         | 2012 | HKG    | MRSA         | NICU        | Active surveillance (PCR) plus decolonisation <sup>‡</sup> vs. active surveillance.                                                                                                                                      | Dominant strategy (\$/percentage point reduction in mortality and infection rates). |
| You[61]         | 2018 | HKG    | CRE          | ICU         | Test-guided selective digestive decontamination <sup>‡</sup> vs. no screening.                                                                                                                                           | \$688/QALY.                                                                         |
| Zboromyrska[62] | 2016 | ESP    | MRSA         | BSI         | PCR-based assay (GeneXpert) for MRSA detection <sup>‡</sup> vs. compared to standard blood culture methods.                                                                                                              | \$243/LY.                                                                           |

Notes: Costs were calculated in 2022 USDs. ABR=Antibiotic-resistant bacteria. AST=Antimicrobial susceptibility testing. CAN=Canada. CSSI=complicated skin and skin structure infections. CMS+IMI=Colistin plus imipenem. CNS=Carbapenem-non-susceptible. CPE=Carbapenemase-producing Enterobacteriaceae. CRE=Carbapenem-resistant Enterobacteriaceae. DPO=Dual priming oligonucleotide. FRA=France. DEU=Deutschland or Germany. ICER=Incremental cost-effectiveness ratio. ICU=Intensive Care Unit. IMI/REL=Imipenem/cilastatin/relebactam. IRN= IRAN. KOR= Korea. L= Linezolid. LOS=Length of hospital stay. NLD=The Netherlands. QALYs=Quality-adjusted life years. PCR=Polymerase chain reaction. SD=Standard Deviation. CHE= Switzerland. ESP, Spain. GBR=Great Britain or United Kingdom. KSA= Kingdom of Saudi Arabia. HKG= Hong Kong. TW=Taiwan. USA=United States of America. VRE=Vancomycin-resistant enterococci. IAI=Intrabdominal infections. CR-GN=Carbapenem resistant Gram-negative bacteria. EU= European Union. CRO=Carbapenem-resistant organisms. CLRHP=Clarithromycin-resistant *Helicobacter pylori*. PRSP= Penicillin-resistant *Streptococcus pneumoniae*. MDR=Multidrug resistant bacteria. LRTI= Low respiratory tract infections.

BSI=Bloodstream infections. \*Mupirocin treatment comparing twice a day during two weeks with no follow-up verification (protocol A) versus all patients who received mupirocin (protocol B) for treating post-surgical infections in cardiac surgery. ICER=Incremental cost-effectiveness ratio. †Evaluated strategy (new intervention); ICERs=(cost intervention – cost comparator)/(efficiency intervention – efficiency comparator). A dominant strategy is one in which the incremental cost of the intervention is less than the comparator and the incremental efficacy is greater than the comparator. QALY= Quality adjusted life year. ICU=Intensive care unit. NICU=Neonatal intensive care unit. vs.=versus. HAI= Hospital-acquired infections. LY=Life year.

**Table SM7.** Characteristics of the included studies (n=59)

| First author                                           | Perspective   | Type of study                                | WTP threshold          | Discount rate | Time horizon                     | Source of effectiveness & costs                                                                                                       | Year of the EE |
|--------------------------------------------------------|---------------|----------------------------------------------|------------------------|---------------|----------------------------------|---------------------------------------------------------------------------------------------------------------------------------------|----------------|
| <b>I. Pharmaceutical interventions (N= 32 studies)</b> |               |                                              |                        |               |                                  |                                                                                                                                       |                |
| Bianchini[3]                                           | Health system | CEA, decision tree                           | \$100,000              | 3%            | Lifetime                         | Literature and RED BOOK[63]                                                                                                           | Not stated     |
| Bolaños-Díaz[4]                                        | Health system | CEA, Markov model                            | \$7,200                | 3%            | 5 years                          | Literature and hospital data on costs                                                                                                 | Not stated     |
| Bounthavong[5]                                         | Health system | CEA, decision tree model                     | WTP range, no specific | Not stated    | Not stated                       | Literature and RED BOOK[63]                                                                                                           | Not stated     |
| Bounthavong[6]                                         | Health system | CEA, decision tree model                     | WTP range, no specific | Not applied   | 15-16 days                       | Literature and health economic resource centre and decision support services.                                                         | 2009           |
| Cara[7]                                                | Hospital      | CEA, decision tree                           | Not stated             | Not applied   | Days in treatment until failure  | Hospital outcomes and costs based on a patient-level study                                                                            | 2016           |
| Collins[8]                                             | Payer         | CEA, decision tree                           | \$100,000/QALY         | 3%            | 15 years                         | The ZEPHYR trial and literature.                                                                                                      | 2014           |
| De Cock[9]                                             | Health system | CEA, decision tree                           | \$52,200               | None          | 11 days                          | RCT and drug costs insurance reimbursement price and expert panel.                                                                    | 2006           |
| De Cock[10]                                            | Hospital      | CEA, decision tree                           | Not stated             | None          | Time to cure                     | RCT and literature.                                                                                                                   | 2006           |
| Goudarzi[11]                                           | Health system | CEA, decision tree                           | WTP range, no specific | 5.8%          | 5 years                          | Literature and tariffs from Iran Health System                                                                                        | 2022           |
| Gutierrez[12]                                          | Payer         | CEA, decision tree                           | \$15,121               | 3%            | 30 days and lifetime             | Chilean National Reports, Ministry of Health, and Financial entity entrusted to collect, manage and distribute state funds for health | 2020           |
| Kong[13]                                               | Health system | CEA, decision tree                           | \$ 12,528/QALY         | 5%            | 5 years                          | Literature and Yaozh database that collects successful bidding prices of drugs                                                        | 2021           |
| Laohavaleeson [14]                                     | Hospital      | CEA, decision tree                           | \$79,750               | None          | 12 days                          | ATLAS trial outcomes and DRG-specific hospital costs                                                                                  | 2006           |
| Lin[15]                                                | Payer         | CEA, decision tree                           | Not stated             | Not stated    | 7-30 days after end of treatment | The ZEPHYR trial and National Health Insurance database (drug costs)                                                                  | Not stated     |
| McKinnon[16]                                           | Hospital      | CUA, mean comparison                         | Not stated             | None          | 35 days                          | RCT and nationally representative hospital costs                                                                                      | 2006           |
| Mennini[17]                                            | Health system | CEA, decision tree                           | \$21,322/QALY          | 3%            | 5 years                          | Clinical inputs from phase 3, RCT TANGO II and costs from the Italian official drug pricing list and legislation                      | Not stated     |
| Mullins[18]                                            | Health system | CEA, decision tree                           | Not stated             | None          | 11 days                          | RCT and health insurance claims data                                                                                                  | 2003           |
| Niederman[19]                                          | Payer         | CEA, piggyback and mean comparison           | \$130,000              | None          | 30 days                          | ZEPHYR study and literature.                                                                                                          | 2011           |
| Patel[20]                                              | Payer         | CEA, decision tree                           | \$195,804              | None          | 4 weeks                          | Literature, expert opinion and DRG data                                                                                               | 2012           |
| Patel[21]                                              | Payer         | CEA, decision tree                           | \$152,400              | None          | 4 weeks                          | RCT, expert opinion and literature.                                                                                                   | 2012           |
| Prabhu[22]                                             | Health system | CEA, decision tree and Montecarlo simulation | \$39,430               | None          | Lifetime                         | RCT and Healthcare cost and utilisation project (HCUP)                                                                                | 2013           |
| Rubio-Terres[23]                                       | Health system | CEA, decision tree                           | \$21,739               | 7.5%          | 14-15 days                       | Literature, Spanish healthcare costs database and General                                                                             | 2011           |

|                                                             |                            |                                                 |                                                                 |             |                                         |                                                                                               |            |
|-------------------------------------------------------------|----------------------------|-------------------------------------------------|-----------------------------------------------------------------|-------------|-----------------------------------------|-----------------------------------------------------------------------------------------------|------------|
| Salas[24]                                                   | Health system              | CEA, decision tree                              | Not stated                                                      | Not applied | 14 days                                 | Counsel of Official Colleges of Pharmacists.<br>RCT and hospital accounts                     | Not stated |
| Schurmann[25]                                               | Hospital and health system | CEA, decision tree                              | \$179,861                                                       | None        | 29 days                                 | RCT, literature and DRG data                                                                  | 2003       |
| Simon[26]                                                   | Health system              | CEA, decision tree & Markov                     | \$100,000-\$150,000/QALY                                        | 3%          | 5 years                                 | Literature and U.S. Department of Veterans Affairs Federal Supply Schedule.                   | 2017       |
| Tan[27]                                                     | Payer                      | CEA, decision tree                              | Not stated                                                      | None        | 4 weeks                                 | Trial literature and clinical expert panel                                                    | Not stated |
| Varon[28]                                                   | Health system              | CEA, decision tree                              | \$3,522                                                         | Not applied | 30 days                                 | Literature and ISS 2001 rate manual for procedures and SIS-MED (report January-December 2013) | 2013       |
| Varon-Vega[29]                                              | Health system              | CEA, decision tree                              | \$2,791                                                         | None        | 7-14 days                               | Colombian manual tariffs and official databases                                               | 2019       |
| Vlachaki[30]                                                | Health system              | CEA, decision tree                              | \$29,031 and \$43,547                                           | 3.5%        | 5 years                                 | British National Formulary, NHS reference costs and literature.                               | 2020       |
| Vu[31]                                                      | Health system              | CEA, decision tree                              | \$45,789                                                        | None        | 7 days                                  | Federal Supply Schedule, other government agencies (Medicare reimbursements) and literature   | 2019       |
| Von Dach[32]                                                | Health system              | CEA, decision tree                              | \$67,480                                                        | Not applied | Duration of therapy until 6 weeks after | RCTs, literature and wholesale prices of generic drugs.                                       | 2016       |
| Wan[33]                                                     | Payer                      | CUA, mean differences and bootstrap simulations | Not stated                                                      | Not stated  | 7–30 days after the end of treatment    | The ZEPHYR trial, healthcare resource utilisation and literature                              | 2012       |
| Yang[34, 35]                                                | Payer                      | CEA, decision tree and Markov model             | \$113,000–169,500                                               | 3%          | 28 days                                 | Literature and red book online database for drug costs.                                       | 2020       |
| <b>II. Non-pharmaceutical interventions (N= 27 studies)</b> |                            |                                                 |                                                                 |             |                                         |                                                                                               |            |
| Brown[36]                                                   | Hospital                   | CEA, decision tree                              | \$4,669 (EU) & \$3,264 (USA)                                    | 3%          | Not stated                              | Literature and hospital accounts for microbiological samples                                  | 2009       |
| Cho[37]                                                     | Hospital                   | CEA, cost comparison and mean differences       | Not stated                                                      | Not stated  | Not stated                              | Hospital costs and protocol                                                                   | Not stated |
| Dymond[38]                                                  | Health system              | CEA, decision tree                              | Not stated                                                      | None        | 12 months                               | Cambridge University Hospitals NHS Foundation and literature                                  | 2010       |
| Gidengil[39]                                                | Hospital                   | CEA, Markov microsimulation model               | \$3,015 per colonisation averted and \$11,306 per death averted | 3%          | 1 year                                  | Literature and expert consensus                                                               | 2013       |
| Ho[40]                                                      | Health system              | CEA, Markov model                               | \$49,149                                                        | 3%          | 2 and 10 days                           | Literature and costs from the largest public health care organization (hospital authority)    | 2014       |
| Hubben[41]                                                  | Hospital                   | CEA, discrete event simulation model            | Not stated                                                      | 3%          | 15 years                                | Literature, bureau of labour statistics and hospital costs                                    | 2007       |
| Jayaraman[42]                                               | Hospital                   | CEA, decision analytic model (tree)             | \$18,215 and \$28,623 per transmission averted.                 | Not applied | 6 months                                | Literature and estimates excess costs from a MDR outbreak in hospitals                        | 2011       |

|                    |                       |                                                          |                        |             |                                   |                                                                                   |            |
|--------------------|-----------------------|----------------------------------------------------------|------------------------|-------------|-----------------------------------|-----------------------------------------------------------------------------------|------------|
| Kang[43]           | Hospital              | CEA, decision tree                                       | Not stated.            | None        | Hospital stay long                | Framework and literature                                                          | 2009       |
| Lapointe-Shaw[44]  | Hospital              | CEA, Markov model                                        | \$122,000 per QALY     | 3%          | Not stated                        | WHO-CHOICE and literature                                                         | 2016       |
| Lee[45]            | Hospital              | CEA, Markov model                                        | Not stated             | Not applied | Not stated                        | Literature                                                                        | 2001       |
| Lee[46]            | Payer                 | CEA, decision tree with Montecarlo simulations           | \$63,733 per QALY      | Not stated  | Not stated                        | Literature and Healthcare Cost and Utilization Project National Inpatient Sample. | Not stated |
| Lee[47]            | Societal and payer    | CEA, decision analytic stochastic model (tree)           | \$13,600               | 3%          | Not stated                        | Human mortality dataset and literature                                            | 2008       |
| Lin[48]            | Health system         | CEA, metapopulation transmission model                   | Not stated             | None        | Not stated                        | Maryland health services cost review commission and literature                    | Not stated |
| Luangasanatip [49] | Hospital              | CUA, metapopulation transmission model                   | \$5,902/QALY           | 3%          | Lifetime                          | Literature and hospital data                                                      | 2016       |
| Mac[50]            | Hospital              | CEA, microsimulation model                               | Not stated             | 1.5%        | 1 year at hospital and lifetime   | Literature                                                                        | 2017       |
| Murthy[51]         | Hospital              | CEA, decision analysis (tree)                            | Not stated             | Not stated  | Hospitalisation period            | Hospital's cost accounting system and literature                                  | 2006       |
| Nelson[52]         | Health system         | CEA, decision tree                                       | Not stated             | Not stated  | Inpatient's stay                  | Literature                                                                        | Not stated |
| Nelson[53]         | Health system         | CEA, decision tree and budget impact model               | Not stated             | 3%          | 29 years                          | Literature                                                                        | 2013       |
| Nelson[54]         | Health system         | CEA, simulation model                                    | WTP range, no specific | 3%          | 8 years                           | Literature and Nationwide Inpatient Sample database                               | 2019       |
| Penno[55]          | Hospital              | CEA, decision tree                                       | \$6,500 per life saved | Not stated  | Not stated                        | WHO and clinical laboratory data                                                  | 2011       |
| Puzniak[56]        | Hospital              | CBA, cost and outcome comparison                         | Not stated             | Not stated  | Not stated                        | Literature and line-item reports from the hospital's microbiology database        | Not stated |
| Robotham[57]       | Health system         | CEA, mathematical individual-based model of transmission | WTP range, no specific | Not stated  | Not stated                        | Literature, National Health Service data and primary data                         | Not stated |
| Robotham[58]       | Health system         | CEA, mathematical model of transmission                  | \$62,500 per QALY      | Not stated  | Five years                        | National health system (NHS) and literature                                       | 2011       |
| Voermans[59]       | Societal and hospital | CEA, decision tree                                       | Not stated             | Not applied | Length of hospital stay (<1 year) | Hospital data and literature                                                      | 2019       |
| You[60]            | Health system         | CEA, decision tree                                       | Not stated             | Not stated  | Not stated                        | Literature and microbiology laboratory of a public hospital in Hong Kong          | Not stated |
| You[61]            | Health system         | CEA, Markov model                                        | \$50,123               | 3%          | Not stated                        | Literature and local hospital costs (health authority)                            | 2015       |
| Zboromyrska[62]    | Hospital              | CEA, decision tree                                       | WTP range, no specific | 3%          | Length of hospital stay           | Literature and hospital data on prevalence                                        | Not stated |

Notes: WTP= Willingness to pay. EU= European union. USA= United States of America. QALY= Quality-adjusted life year. EE= Economic evaluation. DRG= Diagnostic-related group. RCT= randomised controlled trial. CEA= Cost-effectiveness analysis. CUA= Cost-utility analysis. Costs are reported in 2022 USD\$. CBA= Cost-benefit analysis.



**Table SM8.** Unit costs per study for pharmacological interventions (in 2022 USDs)

| <b>I. Pharmaceutical interventions (A): Patients with MRSA or suspected MRSA investigating Cellulitis or Complicated Skin and Skin Structure Infections (cSSSI) treated with linezolid versus vancomycin</b> |                                        |                     |       |                                                |                                                                                                |          |                                        |                     |       |                     |                                                                                                      |         |
|--------------------------------------------------------------------------------------------------------------------------------------------------------------------------------------------------------------|----------------------------------------|---------------------|-------|------------------------------------------------|------------------------------------------------------------------------------------------------|----------|----------------------------------------|---------------------|-------|---------------------|------------------------------------------------------------------------------------------------------|---------|
| Article                                                                                                                                                                                                      | Linezolid costs (\$)                   |                     |       |                                                |                                                                                                |          | Vancomycin costs (\$)                  |                     |       |                     |                                                                                                      |         |
|                                                                                                                                                                                                              | ICU ward                               | General ward        | Tests | Drugs                                          | Additional                                                                                     | Total    | ICU ward                               | General ward        | Tests | Drugs               | Additional                                                                                           | Total   |
| <b>Bounthavong, 2009[5]</b>                                                                                                                                                                                  | NS                                     | \$1565 Ward per day | NS    | \$256 (iv) per day<br>\$200 (oral) per day     | \$53 microbiology culture per day<br>\$11 platelet monitoring per day                          | \$13938  | NS                                     | \$1565 Ward per day | NS    | \$11 (iv) per day   | \$8 vancomycin labs per day<br>\$53 microbiology culture per day<br>\$11 platelet monitoring per day | \$34076 |
| <b>Bounthavong, 2011[6]</b>                                                                                                                                                                                  | NS                                     | \$2687 per day      | NS    | \$303 (iv) per day<br>\$232 (oral) per day     | \$55 Microbiological culture, per day<br>\$12 Platelet monitoring, per day                     | \$22752  | NS                                     | \$2687 per day      | NS    | \$18 (iv) per day   | \$55 Microbiological culture, per day<br>\$12 Platelet monitoring, per day                           | \$29825 |
| <b>De Cock, 2009a[10]</b>                                                                                                                                                                                    | \$1095 ICU without ventilator, per day | \$322 Ward per day  | \$655 | \$332 (iv), per day.<br>\$322 (oral), per day. | \$505 Isolation, per day.<br>\$27 Infusion (iv) longer than 30 minutes<br>\$371 Adverse events | \$23,357 | \$1095 ICU without ventilator, per day | \$322 Ward per day  | \$803 | \$89 (iv) per day   | \$505 Isolation, per day.<br>\$27 Infusion (iv) longer than 30 minutes<br>\$371 Adverse events       | \$20722 |
| <b>McKinnon, 2006[16]</b>                                                                                                                                                                                    | \$1512 per day                         | \$617 per day       | NS    | \$182 (iv), per day<br>\$134 (oral), per day   | \$68 Intravenous administration/dose<br>\$803 Step-down; per day                               | \$6492   | \$1512 per day                         | \$617 per day       | NS    | \$35 (iv), per day  | \$68 Intravenous administration/dose<br>\$803 Step-down; per day                                     | \$7988  |
| <b>Schurmann, 2009[25]</b>                                                                                                                                                                                   | NS                                     | \$336 per day       | NS    | \$304 (iv), per day<br>\$295 (oral), per day   | \$530 Isolation, per day<br>\$26 Intravenous infusion, per day                                 | \$11013  | NS                                     | \$356 per day       | NS    | \$130 (iv), per day | \$530 Isolation, per day<br>\$26 Intravenous infusion, per day                                       | \$13188 |

|  |  |  |  |  |                                                                  |  |  |  |  |  |  |                                                                  |
|--|--|--|--|--|------------------------------------------------------------------|--|--|--|--|--|--|------------------------------------------------------------------|
|  |  |  |  |  | \$68 GP, per home visit.                                         |  |  |  |  |  |  | \$68 GP, per home visit.                                         |
|  |  |  |  |  | \$65 Specialist, per consultation                                |  |  |  |  |  |  | \$65 Specialist, per consultation                                |
|  |  |  |  |  | \$63 GP, per office visit                                        |  |  |  |  |  |  | \$63 GP, per office visit                                        |
|  |  |  |  |  | \$489 Other inpatient (test and adverse events)                  |  |  |  |  |  |  | \$738 Other inpatient (test and Adverse events)                  |
|  |  |  |  |  | \$2490 Post discharge (outpatient antibiotic drugs, test, visit) |  |  |  |  |  |  | \$1911 Post discharge (outpatient antibiotic drugs, test, visit) |

**I. Pharmaceutical interventions (B):** Patients with MRSA or suspected MRSA investigating Cellulitis or Complicated Skin and Skin Structure Infections (cSSSI) Linezolid treated with daptomycin

Linezolid. Cost (\$)

Daptomycin cost (\$)

| Article              | ICU ward | General ward   | Tests | Drugs                                      | Additional                                                                     | Total    | ICU ward | General ward   | Tests | Drugs              | Additional                                                                     | Total   |
|----------------------|----------|----------------|-------|--------------------------------------------|--------------------------------------------------------------------------------|----------|----------|----------------|-------|--------------------|--------------------------------------------------------------------------------|---------|
| Bounthavong, 2011[6] | NS       | \$2687 per day | NS    | \$303 (iv) per day<br>\$232 (oral) per day | \$55 Microbiological culture, per day<br><br>\$12 Platelet monitoring, per day | \$ 22752 | NS       | \$2687 per day | NS    | \$344 (iv) per day | \$55 Microbiological culture, per day<br><br>\$12 Platelet monitoring, per day | \$26079 |

**I. Pharmaceutical interventions (C):** Patients with MRSA or suspected MRSA investigating Cellulitis or Complicated Skin and Skin Structure Infections (cSSSI) Telavancin versus Vancomycin

Telavancin cost (\$)

Vancomycin cost (\$)

| Article                                                | ICU ward | General ward | Tests | Drugs | Additional                                          | Total   | ICU ward | General ward | Tests | Drugs | Additional                                                                      | Total   |
|--------------------------------------------------------|----------|--------------|-------|-------|-----------------------------------------------------|---------|----------|--------------|-------|-------|---------------------------------------------------------------------------------|---------|
| Laohavalee on, 2008[14] (Telavancin versus Vancomycin) | NS       | NS           | NS    | \$18  | \$144 Study drug<br><br>\$528 Additional antibiotic | \$11801 | NS       | NS           | NS    | \$18  | \$144 Study drug<br><br>\$568 Additional antibiotic<br><br>\$68 Drug monitoring | \$10345 |

**I. Pharmaceutical interventions (D):** Patients with MRSA or suspected MRSA investigating Nosocomial Pneumonia treated with linezolid versus vancomycin

| Article                    | Linezolid costs (\$) |                |                                              |                      |                                                                                |         | Vancomycin costs (\$) |                |                                              |                |                                                                                |                                                   |
|----------------------------|----------------------|----------------|----------------------------------------------|----------------------|--------------------------------------------------------------------------------|---------|-----------------------|----------------|----------------------------------------------|----------------|--------------------------------------------------------------------------------|---------------------------------------------------|
| <b>Collins, 2015[8]</b>    | NS                   | NS             | NS                                           | \$283 (iv) per day   | \$16544 Attributable cost, Nephrotoxicity                                      | \$27009 | NS                    | NS             | \$10                                         | \$31           | \$16544 Attributable cost, Nephrotoxicity                                      | \$2598                                            |
|                            |                      |                |                                              | \$235 (oral) per day | \$24047 Attributable cost, Thrombocytopenia                                    |         |                       |                |                                              |                | \$24047 Attributable cost, Thrombocytopenia                                    |                                                   |
|                            |                      |                |                                              |                      | \$2047 Attributable cost, Pneumonia                                            |         |                       |                |                                              |                | \$2047 Attributable cost, Pneumonia                                            |                                                   |
| <b>De Cock, 2009b[9]</b>   | \$2401 per day       | \$391 per day  | \$171 Biochemistry monitoring test, per unit | \$104 (iv or oral)   | \$255 Monitoring test (biochemical, hemogram, C-reactive protein, other drugs) | \$12989 | \$2401 per day        | \$391 per day  | \$171 Biochemistry monitoring test, per unit | \$7 (iv)       | \$255 Monitoring test (biochemical, hemogram, C-reactive protein, other drugs) | \$14657                                           |
|                            |                      |                |                                              |                      | \$104 Co-mediations                                                            |         |                       |                |                                              |                | \$159 Co-mediations                                                            |                                                   |
|                            |                      |                |                                              |                      | \$120 Treatment Acute Encephalitis Syndrome (AEs)                              |         |                       |                |                                              |                | \$1079                                                                         | \$149 Treatment Acute Encephalitis Syndrome (AEs) |
|                            |                      |                |                                              |                      | \$341 Post-discharge (visit and test)                                          |         |                       |                |                                              |                | \$509 Post-discharge (visit and test)                                          |                                                   |
| <b>Lin, 2016[15]</b>       | \$474 per day        | \$87 per day   | NS                                           | \$1252               | \$2 Lab work (serum creatinine levels)                                         | \$6900  | \$474 per day         | \$87 per day   | NS                                           | \$263          | \$2 Lab work (serum creatinine levels)                                         | \$6474                                            |
|                            |                      |                |                                              |                      | \$                                                                             |         |                       |                |                                              |                | \$12 Lab work (serum vancomycin levels)                                        |                                                   |
| <b>Mullins, 2006</b>       | NS                   | NS             | NS                                           | \$2949, per day      | NS                                                                             | \$33331 | NS                    | NS             | NS                                           | \$3132 per day | NS                                                                             | \$33511 per day                                   |
| <b>Niederman, 2014[19]</b> | \$3520 per day       | \$1645 per day | \$44                                         | \$131 (iv)           | \$2133 Mechanical ventilation                                                  | \$54905 | \$3520 per day        | \$1645 per day | Laboratory test: \$47                        | \$7 (iv)       | \$2086 Mechanical ventilation                                                  | \$54774                                           |
|                            |                      |                |                                              |                      | \$2449 Study drugs                                                             |         |                       |                |                                              |                | \$306 Study drugs                                                              |                                                   |
|                            |                      |                |                                              |                      |                                                                                |         |                       |                |                                              |                | \$604 Dialysis                                                                 |                                                   |

|                          |                                                            |                                                               |      |                |                                                                                                                                               |                                   |                                                                |                                                               |      |                |                                                                                                                                                |                                   |
|--------------------------|------------------------------------------------------------|---------------------------------------------------------------|------|----------------|-----------------------------------------------------------------------------------------------------------------------------------------------|-----------------------------------|----------------------------------------------------------------|---------------------------------------------------------------|------|----------------|------------------------------------------------------------------------------------------------------------------------------------------------|-----------------------------------|
|                          |                                                            |                                                               |      |                | \$132 Dialysis                                                                                                                                |                                   |                                                                |                                                               |      |                |                                                                                                                                                |                                   |
| <b>Patel, 2014a [21]</b> | \$4078 to adjusted to received therapy.<br>*\$4065 per day | \$2917 total adjusted to received therapy.<br>*\$2349 per day | \$78 | \$25           | \$205 administration<br>\$2344 Physician/attending visit.<br>\$1353 Lab work<br>\$2573 Serious adverse event<br>\$2224 Mechanical ventilation | \$54940                           | \$41326 total adjusted to received therapy.<br>*\$4065 per day | \$4194 total adjusted to received therapy.<br>*\$2349 per day | \$43 | \$888          | \$ 217 administration<br>\$2488 Physician/attending visit.<br>\$1482 Lab work<br>\$3155 Serious adverse event<br>\$2171 Mechanical ventilation | \$55920                           |
| <b>Patel, 2014b[20]</b>  | *\$1878 ICU +mechanical ventilation, per day               | *\$1077 Ward + isolation, per day:                            | NS   | \$87 (iv)      | NS                                                                                                                                            | \$23025 Total base case inpatient | *\$1878 ICU +mechanical ventilation, per day                   | *\$1077 Ward + isolation, per day:                            | NS   | \$14 (iv)      | NS                                                                                                                                             | \$23212 Total base case inpatient |
| <b>Tan, 2014[27]</b>     | \$2093 Beijing                                             | \$277 Beijing                                                 | NS   | \$143 per vial | NS                                                                                                                                            | \$24716 Beijing                   | \$2093 Beijing                                                 | \$277 Beijing                                                 | NS   | \$46, per vial | NS                                                                                                                                             | \$24700 Beijing                   |
|                          | \$2415 Guangzhou                                           | \$293 Guangzhou                                               |      |                |                                                                                                                                               | \$28012 Guangzhou                 | \$2415 Guangzhou                                               | \$293 Guangzhou                                               |      |                |                                                                                                                                                | \$28025 Guangzhou                 |
|                          | \$22157 Nanjing                                            | \$283 Nanjing                                                 |      |                |                                                                                                                                               | \$25376 Nanjing                   | \$22157 Nanjing                                                | \$223 Xi'an                                                   |      |                |                                                                                                                                                | \$25375 Nanjing                   |
|                          | \$1530 Xi'an                                               | \$223 Xi'an                                                   |      |                |                                                                                                                                               | \$18945 Xi'an                     | \$1530 Xi'an                                                   |                                                               |      |                |                                                                                                                                                | \$18802 Xi'an                     |
| <b>Varon, 2014[28]</b>   | \$856 Stay (ICU and standard room)                         |                                                               | NS   | \$1097         | \$4452 Management of kidney failure                                                                                                           | 1521                              | \$856 Stay (ICU and standard room)                             |                                                               | NS   | \$83           | NS                                                                                                                                             | 1166                              |

|                      |                |               |                                        |                                                              |                   |                |               |                        |                                      |                                                                                                                            |                   |
|----------------------|----------------|---------------|----------------------------------------|--------------------------------------------------------------|-------------------|----------------|---------------|------------------------|--------------------------------------|----------------------------------------------------------------------------------------------------------------------------|-------------------|
| <b>Wan, 2016[33]</b> | \$1719 Beijing | \$287 Beijing | \$151 (iv) Beijing<br>\$151 (iv) Xi'an | \$83 Management of thrombocytopenia                          | \$26506 Beijing   | \$1719 Beijing | \$287 Beijing | \$32 Beijing and Xi'an | \$96 (iv) Beijing<br>\$96 (iv) Xi'an | \$4452 Management of kidney failure                                                                                        | \$25852 Beijing   |
|                      | \$1176 Xi'an   | \$231 Xi'an   |                                        | \$160 Mechanical ventilator Xi'an, per day                   | \$30320 Guangzhou | \$1176 Xi'an   | \$231 Xi'an   |                        |                                      | \$83 Management of thrombocytopenia                                                                                        | \$29804 Guangzhou |
|                      |                |               |                                        | \$1066 Continuous renal replacement therapy Beijing, per day | \$27450 Nanjing   |                |               |                        |                                      | \$200 Mechanical ventilator Beijing, per day                                                                               | \$26922 Nanjing   |
|                      |                |               |                                        | \$1583 Continuous renal replacement therapy Xi'an, per day   | \$19796 Xi'an     |                |               |                        |                                      | \$160 Mechanical ventilator Xi'an, per day                                                                                 | \$19260 Xi'an     |
|                      |                |               |                                        |                                                              |                   |                |               |                        |                                      | \$1066 Continuous renal replacement therapy Beijing, per day<br>\$1583 Continuous renal replacement therapy Xi'an, per day |                   |

**I. Pharmaceutical interventions (E):** Patients with MRSA or suspected MRSA investigating Nosocomial Pneumonia treated with low dose of colistin and high dose of colistin

Low dose of colistin Cost (\$)

| Article              | Low dose of colistin Cost (\$) |                |                   |               |                                    | High dose of colistin treatment Cost (\$) |                |                |                    |                |                                    |         |
|----------------------|--------------------------------|----------------|-------------------|---------------|------------------------------------|-------------------------------------------|----------------|----------------|--------------------|----------------|------------------------------------|---------|
|                      | ICU ward                       | General ward   | Tests             | Drugs         | Additional                         | Total                                     | ICU ward       | General ward   | Tests              | Drugs          | Additional                         | Total   |
| <b>Cara, 2018[7]</b> | \$3850 per day                 | \$3908 per day | \$836 CBC per day | \$932 per day | \$1045 GW nurse visits, per day    | \$22912                                   | \$5587 per day | \$3400 per day | \$842 CBC, per day | \$624, per day | \$1052 GW nurse visits, per day    | \$20390 |
|                      |                                |                |                   |               | \$770 ICU nurse visits, per day    |                                           |                |                |                    |                | \$1117 ICU nurse visits, per day   |         |
|                      |                                |                |                   |               | \$281 Laboratory cultures, per day |                                           |                |                |                    |                | \$188 Laboratory cultures, per day |         |

**I. Pharmaceutical interventions (F):** Patients with MRSA or suspected MRSA investigating Nosocomial Pneumonia treated with Ceftazidime-avibactam vs. colistin-based treatment.

Ceftazidime-avibactam cost (\$)

Colistin-based cost (\$)

| Article                      | ICU ward | General ward | Tests | Drugs           | Additional                                                                                                                                                                                               | Total    | ICU ward | General ward | Tests | Drugs         | Additional                                                                                                                                                                                               | Total    |
|------------------------------|----------|--------------|-------|-----------------|----------------------------------------------------------------------------------------------------------------------------------------------------------------------------------------------------------|----------|----------|--------------|-------|---------------|----------------------------------------------------------------------------------------------------------------------------------------------------------------------------------------------------------|----------|
| <b>Bolaños-Díaz, 2022[4]</b> | NS       | NS           | NS    | \$12240 per day | \$267 Hospitalization costs, per day<br>\$19999 Long-term care, per year<br>\$19094 Nephrotoxicity, Chronic dialysis, per year<br>\$2203 Nephrotoxicity, With RRT<br>\$12240 Nephrotoxicity, Without RRT | \$28764  |          |              |       | \$163 per day | \$267 Hospitalization costs, per day<br>\$19999 Long-term care, per year<br>\$19094 Nephrotoxicity, Chronic dialysis, per year<br>\$2203 Nephrotoxicity, With RRT<br>\$12240 Nephrotoxicity, Without RRT | \$16322  |
| <b>Simon, 2019[26]</b>       | NS       | NS           | NS    | \$1028 per day  | \$100355 chronic dialysis, per year<br>\$105113 long-term care, per year<br>\$26722 long-term health care for sepsis, first year<br>\$8971 long-term health care costs of sepsis, subsequent year        | \$173493 | NS       | NS           | NS    | \$29 per day  | \$100355 chronic dialysis, per year<br>\$105113 long-term care, per year<br>\$26722 long-term health care for sepsis, first year<br>\$8971 long-term health care costs of sepsis, subsequent year        | \$120768 |
| <b>Varon-Vega, 2022[29]</b>  | \$332    | \$37         | NS    | \$43            | \$452 Adverse event, Renal failure<br>\$1269 Adverse event, Dialysis                                                                                                                                     | 8781     | \$332    | \$13         | NS    | \$13          | \$452 Adverse event, Renal failure<br>\$1269 Adverse event, Dialysis                                                                                                                                     | \$5264   |

**I. Pharmaceutical interventions (G):** Patients treated with other intervention types for MRSA and gram-negative infections including carbapenem non-susceptible infections

| Article                                                                                                     | Intervention 1 cost (\$) |              |       |                                                                                                                                                                              |                                                                                                                                        | Intervention 2 cost (\$) |              |       |       |                                | Total                                                                                                                                  |        |
|-------------------------------------------------------------------------------------------------------------|--------------------------|--------------|-------|------------------------------------------------------------------------------------------------------------------------------------------------------------------------------|----------------------------------------------------------------------------------------------------------------------------------------|--------------------------|--------------|-------|-------|--------------------------------|----------------------------------------------------------------------------------------------------------------------------------------|--------|
|                                                                                                             | ICU ward                 | General ward | Tests | Drugs                                                                                                                                                                        | Additional                                                                                                                             | ICU ward                 | General ward | Tests | Drugs | Additional                     |                                                                                                                                        |        |
| <b>Bianchini, 2022[3]</b><br>(New beta-lactam beta-lactamase Inhibitor antibiotics‡ vs. colistin treatment) | NS                       | NS           | NS    | \$1259 Meropenem-vaborbactam, per day<br>\$870 Ceftolozane-tazobactam, per day<br>\$1361 Imipenem-relebactam, per day<br>\$40 Polymyxin, per day<br>\$207 Meropenem, per day | NS                                                                                                                                     | \$17172                  | NS           | NS    | NS    | \$8                            | NS                                                                                                                                     | \$3710 |
| <b>Goudarzi, 2023[11]</b><br>(Ceftazidime avibactam vs. colistin treatment.)                                | NS                       | NS           | NS    | \$649                                                                                                                                                                        | \$598 Long term care<br>\$901 nephrotoxicity without renal replacement therapy<br>\$9764 Nephrotoxicity with renal replacement therapy | \$885                    | NS           | NS    | NS    | \$445                          | \$598 Long term care<br>\$901 nephrotoxicity without renal replacement therapy<br>\$9764 Nephrotoxicity with renal replacement therapy | \$460  |
| <b>Gutierrez, 2021[12]</b><br>(Ceftazidime/avibactam vs.                                                    | \$240                    | \$58         | NS    | \$128, per vial                                                                                                                                                              | \$240 Prevention of kidney failure<br>\$1256 Dialysis, per month                                                                       | \$9566                   | \$240        | \$58  | NS    | \$8 Meropenem<br>\$15 Colistin | \$240 Prevention of kidney failure<br>\$1256 Dialysis, per month                                                                       | \$6423 |

|                                                                                             |    |    |    |                    |                                                                                  |             |    |    |    |                              |                                                                                  |            |  |
|---------------------------------------------------------------------------------------------|----|----|----|--------------------|----------------------------------------------------------------------------------|-------------|----|----|----|------------------------------|----------------------------------------------------------------------------------|------------|--|
| colistin+ meropenem treatment)                                                              |    |    |    |                    | \$24 Creatinine                                                                  |             |    |    |    |                              | \$24 Creatinine                                                                  |            |  |
|                                                                                             |    |    |    |                    | \$2 Ureic nitrogen                                                               |             |    |    |    |                              | \$2 Ureic nitrogen                                                               |            |  |
|                                                                                             |    |    |    |                    | \$4 Hemogram                                                                     |             |    |    |    |                              | \$4 Hemogram                                                                     |            |  |
|                                                                                             |    |    |    |                    | \$0.2 Plasma electrolytes                                                        |             |    |    |    |                              | \$0.2 Plasma electrolytes                                                        |            |  |
| <b>Kong, 2023[13]</b><br>(Ceftazidime-avibactam vs. polymyxin B (PMB) monotherapy)          | NS | NS | NS | \$606 per day      | \$2483 Long-term care                                                            | \$237269 34 | NS | NS | NS | \$667 per day                | \$2483 Long-term care                                                            | \$23514366 |  |
|                                                                                             |    |    |    |                    | \$5715 Nephrotoxicity without renal replacement therapy in hospital              |             |    |    |    |                              | \$5715 Nephrotoxicity without renal replacement therapy in hospital              |            |  |
|                                                                                             |    |    |    |                    | \$11955 Nephrotoxicity with renal replacement therapy in hospital                |             |    |    |    |                              | \$11955 Nephrotoxicity with renal replacement therapy in hospital                |            |  |
|                                                                                             |    |    |    |                    | \$30746 Hemodialysis, per year                                                   |             |    |    |    |                              | \$30746 Haemodialysis, per year                                                  |            |  |
| <b>Mennini, 2021[17]</b><br>Vaborem (meropenem-vaborbactam) versus best available treatment | NS | NS | NS | \$1141 Carbapenems | \$8206 Hospital acquired pneumonia (HAP)/ Ventilation associated pneumonia (VAP) | \$3287      | NS | NS | NS | \$3428 Ceftazidime-Avibactam | \$8206 Hospital acquired pneumonia (HAP)/ Ventilation associated pneumonia (VAP) | \$ 2121    |  |
|                                                                                             |    |    |    |                    | \$3856 Complicated urinary tract infections (cUTI)                               |             |    |    |    | \$642 Colistin               | \$3856 Complicated urinary tract infections (cUTI)                               |            |  |
|                                                                                             |    |    |    |                    |                                                                                  |             |    |    |    | \$23 Aminoglycosides         | \$4975 Complicated intra-abdominal infections (cIAI)                             |            |  |



|                                                                         |                 |                 |    |                                |                                                             |                      |                 |                 |    |                                 |                                                             |                                     |
|-------------------------------------------------------------------------|-----------------|-----------------|----|--------------------------------|-------------------------------------------------------------|----------------------|-----------------|-----------------|----|---------------------------------|-------------------------------------------------------------|-------------------------------------|
|                                                                         |                 |                 |    |                                | \$4975 Complicated intra-abdominal infections (cIAI)        |                      |                 |                 |    |                                 |                                                             | \$7844 Bloodstream infections (BSI) |
|                                                                         |                 |                 |    |                                | \$7844 Bloodstream infections (BSI)                         |                      |                 |                 |    |                                 |                                                             |                                     |
| <b>Rubio-Terres, 2012[23]</b><br>(Daptomycin vs. vancomycin treatment.) | NS              | NS              | NS | \$160                          | \$2 Sodium chloride 0.9% (1 bag of 50 mL)                   | \$ 21359 per patient | NS              | NS              | NS | \$12                            | \$2 Sodium chloride 0.9% (1 bag of 50 mL)                   | \$ 21995 per patient                |
|                                                                         |                 |                 |    |                                | \$1 Sterile water for injection (1 ampoule of 20 mL)        |                      |                 |                 |    |                                 | \$1 Sterile water for injection (1 ampoule of 20 mL)        |                                     |
|                                                                         |                 |                 |    |                                | \$1324 Admission to the Infectious Diseases Service (1 day) |                      |                 |                 |    |                                 | \$1324 Admission to the Infectious Diseases Service (1 day) |                                     |
|                                                                         |                 |                 |    |                                | \$802 Admission to the Internal Medicine Service (1 day)    |                      |                 |                 |    |                                 | \$802 Admission to the Internal Medicine Service (1 day)    |                                     |
|                                                                         |                 |                 |    |                                | \$0.5 IV administrations by a nurse (1 minute of work day)  |                      |                 |                 |    |                                 | \$0.5 IV administrations by a nurse (1 minute of work day)  |                                     |
| <b>Salas, 2016[24]</b><br>(Protocol A versus B) [24]                    | *\$4258 per day | *\$2063 per day | NS | \$1195 Screening and treatment | *\$113 Nurse, per hour                                      | \$49683 per patient  | *\$4258 per day | *\$2063 per day | NS | \$2894 Screening and treatment: | **\$113 Nurse, per hour                                     | \$47254 per patient                 |
|                                                                         |                 |                 |    | *\$10 Mupirocin ointment       | *\$74 Nursing assistant, per hour                           |                      |                 |                 |    | *\$10 Mupirocin ointment        | *\$74 Nursing assistant, per hour                           |                                     |
|                                                                         |                 |                 |    |                                | *\$0.04 Chlorhexidine (sponge)                              |                      |                 |                 |    |                                 | *\$0.04 Chlorhexidine (sponge)                              |                                     |
|                                                                         |                 |                 |    |                                |                                                             |                      |                 |                 |    |                                 | *\$0.35 Syringe 2ml 2 bodies                                |                                     |

|                                                                                             |                 |                 |    |                               |                                              |                                                                |                 |                 |    |                              |                                               |                                                                |  |
|---------------------------------------------------------------------------------------------|-----------------|-----------------|----|-------------------------------|----------------------------------------------|----------------------------------------------------------------|-----------------|-----------------|----|------------------------------|-----------------------------------------------|----------------------------------------------------------------|--|
|                                                                                             |                 |                 |    |                               | *\$0.35 Syringe 2ml 2 bodies                 |                                                                |                 |                 |    |                              | *\$0.04 Non-sterile latex glove               |                                                                |  |
|                                                                                             |                 |                 |    |                               | *\$0.04 Non-sterile latex glove              |                                                                |                 |                 |    |                              | *\$8 Dish culture                             |                                                                |  |
|                                                                                             |                 |                 |    |                               | *\$8 Dish culture                            |                                                                |                 |                 |    |                              |                                               |                                                                |  |
| <b>Prabhu, 2017[22]</b><br>(CTM versus PT) [22]                                             | *\$659 per day  | *\$549 per day  | NS | \$1161 Total cost per patient | NS                                           | \$4340 per patient considering hospitalisation and drugs costs | *\$659 per day  | *\$549 per day  | NS | \$275 Total cost per patient | NS                                            | \$3656 per patient considering hospitalisation and drugs costs |  |
| <b>Vlachaki, 2021[30]</b><br>(Vaborem (meropenem-vaborbactam) vs. best available treatment) | \$2748 per unit | \$525 per unit  | NS | \$ 4222                       | \$96 Adverse events                          | \$66338 Total cost for long-term                               | \$2748 per unit | \$525 per unit  | NS | \$1202                       | \$816 Adverse events                          | \$58656 Total cost for long-term                               |  |
|                                                                                             |                 |                 |    |                               | \$2793 Clinical failure                      |                                                                |                 |                 |    |                              | \$5043 Clinical failure                       |                                                                |  |
|                                                                                             |                 |                 |    |                               | \$143 Nephrotoxicity                         |                                                                |                 |                 |    |                              | \$1253 Nephrotoxicity                         |                                                                |  |
|                                                                                             |                 |                 |    |                               | \$61 renal replacement therapy (in hospital) |                                                                |                 |                 |    |                              | \$492 renal replacement therapy (in hospital) |                                                                |  |
|                                                                                             |                 |                 |    |                               | \$49 renal replacement therapy               |                                                                |                 |                 |    |                              | \$330 renal replacement therapy               |                                                                |  |
|                                                                                             |                 |                 |    |                               | \$170 Chronic renal replacement therapy      |                                                                |                 |                 |    |                              | \$1149 Chronic renal replacement therapy      |                                                                |  |
| <b>Yang, 2022[34]</b>                                                                       | *\$4472 per day | *\$2618 per day | NS | \$12833 Total cost:           | \$4550 Adverse events                        | 102622                                                         | *\$4472 per day | *\$2618 per day | NS | \$2620 Total cost            | \$16145 Adverse events                        | \$114156                                                       |  |
|                                                                                             |                 |                 |    |                               |                                              |                                                                |                 |                 |    |                              | \$95097 Hospital recourse                     |                                                                |  |

|                               |  |  |  |  |                                     |  |  |  |  |  |  |  |                            |
|-------------------------------|--|--|--|--|-------------------------------------|--|--|--|--|--|--|--|----------------------------|
| (IMI/REL versus CSM+IMI) [34] |  |  |  |  | \$84813 Hospital recourse: \$92,153 |  |  |  |  |  |  |  | \$294 Long-term monitoring |
|                               |  |  |  |  | \$426 Long-term monitoring          |  |  |  |  |  |  |  |                            |

**I. Pharmaceutical interventions (H): Patients with MRSA tackling interventions with BSI Daptomycin vs. linezolid 4-weeks treatment**

| Article                                                                         | ICU ward | General ward | Tests | Drugs                                   | Additional                                                                         | Total                     | ICU ward | General ward | Tests | Drugs                                                | Additional                                                                         | Total   |
|---------------------------------------------------------------------------------|----------|--------------|-------|-----------------------------------------|------------------------------------------------------------------------------------|---------------------------|----------|--------------|-------|------------------------------------------------------|------------------------------------------------------------------------------------|---------|
| Intervention 1 Costs (\$)                                                       |          |              |       |                                         |                                                                                    | Intervention 2 Costs (\$) |          |              |       |                                                      |                                                                                    |         |
| <b>Vu, 2021[31]</b><br>Daptomycin vs. linezolid 4-weeks treatment.              | NS       | \$3576       | NS    | \$89 Daptomycin per day                 | \$0.4 Monitoring per Daptomycin: 1 Creatinine phosphokinase test per week, per day | \$33918                   | NS       | \$3576       | NS    | \$35 (iv) per day<br>\$3 (oral) per day              | NS                                                                                 | \$33004 |
| <b>Vu, 2021[31]</b><br>(Linezolid vs. vancomycin 4-weeks treatment)             | NS       | \$3576       | NS    | \$35 (iv) per day<br>\$3 (oral) per day | NS                                                                                 | \$33004                   | NS       | \$3576       | NS    | \$3 per day                                          | \$2 Monitoring per Vancomycin: 1 trough every 3 day, per day                       | \$34414 |
| <b>Vu, 2021[31]</b><br>(Linezolid vs. ceftaroline/daptomycin 4-weeks treatment) | NS       | \$3576       | NS    | \$35 (iv) per day<br>\$3 (oral) per day | NS                                                                                 | \$33004                   | NS       | \$3576       | NS    | \$367 Ceftaroline per day<br>\$89 Daptomycin per day | \$0.4 Monitoring per Daptomycin: 1 Creatinine phosphokinase test per week, per day | \$33918 |

**I. Pharmaceutical interventions (I): Patients with MRSA tackling interventions Trimethoprim-sulfamethoxazole + rifampicin vs. linezolid**

| Trimethoprim-sulfamethoxazole+ rifampicin cost (\$) |          |              |       |                                        |                                               | Linezolid cost (\$) |          |              |       |                            |                                               |        |
|-----------------------------------------------------|----------|--------------|-------|----------------------------------------|-----------------------------------------------|---------------------|----------|--------------|-------|----------------------------|-----------------------------------------------|--------|
| Article                                             | ICU ward | General ward | Tests | Drugs                                  | Additional                                    | Total               | ICU ward | General ward | Tests | Drugs                      | Additional                                    | Total  |
| <b>Von Dach, 2017[32]</b>                           | NS       | NS           | NS    | \$6 (iv) trimethoprim-sulfamethoxazole | \$23 adverse drug reaction<br>\$2 IV material | \$165               | NS       | NS           | NS    | \$104 (iv)<br>\$106 (oral) | \$11 adverse drug reaction<br>\$2 IV material | \$2865 |

---

|                                                   |
|---------------------------------------------------|
| \$1 (iv)<br>trimethoprim-<br>sulfamethoxazo<br>le |
| \$42 (iv)<br>rifampicin                           |
| \$4 (oral)<br>rifampicin                          |

---

Notes: ICU, intensive care unit; tests: included diagnostic tests during inpatient stay; drugs: included drug acquisition cost only; additional: additional costs including monitoring costs, drug administration costs, isolation costs; NS, not stated, i.e., the study did not explicitly state this data. AEs, Acute encephalitis syndrome. CI, Confidence intervals. SD, Standard deviation. LOS, Length of hospital stay. Iv, Intravenous. GP, General practitioner. Where standard deviation or confidence intervals were reported, these have been included. Pd, per diem. Costs were calculated in 2022 USDs. All costs were inflated using the following website (<http://eppi.ioe.ac.uk/costconversion/default.aspx>). Drug acquisition costs were either found from nationally representative wholesale values or from hospital purchasing departments. Additional costs, whenever reported, ranged from isolation costs for intensive care unit (ICU) wards, monitoring and drug administration and diagnostic costs, as part of moving from empirical therapy to targeted antibiotics. \*Generic values used for wards or ICU beds, ventilator, and tests, regardless therapy, or treatment.

**Table SM9.** Unit costs per study for non-pharmaceutical interventions (in 2022 USDs)

| Article                 | Unit Costs                                       |                                  |                                                                                  | Total costs                                                                     |
|-------------------------|--------------------------------------------------|----------------------------------|----------------------------------------------------------------------------------|---------------------------------------------------------------------------------|
|                         | Staff                                            | Hospital                         | Test/intervention                                                                |                                                                                 |
| <b>Brown, 2010[36]</b>  | Performing the test and specimen collection \$32 | NS                               | PCR test USA \$79                                                                | The weighted mean treatment. US \$41199                                         |
|                         |                                                  |                                  | PCR test UE \$89                                                                 | The weighted mean treatment. EU \$60366                                         |
| <b>Cho, 2019[37]</b>    | Physicians visit \$16                            | Endoscopy without sedation: \$67 | <i>Helicobacter pylori</i> diagnosis screening for rapid urease test (RUT): \$10 | Urea breath test: \$32                                                          |
|                         |                                                  | Endoscopy with sedation: \$165   | <i>Helicobacter pylori</i> diagnosis screening for DPO-PCR testing: \$69         | Clarithromycin-based triple therapy second-line treatment, per patient: \$62412 |
|                         |                                                  |                                  | <i>Helicobacter pylori</i> diagnosis screening biopsy: \$9                       | Tailored therapy using DPO-PCR, first-line therapy, per patient: \$37468        |
|                         |                                                  |                                  | <i>Helicobacter pylori</i> diagnosis screening endoscopy forceps: \$21           | Tailored therapy using DPO-PCR, second-line therapy, per patient: \$37791       |
| <b>Dymond, 2020[38]</b> | NS                                               | NS                               | Genome sequenced, per unit: \$108                                                | Symptomatic MRSA, per case: \$18617                                             |
|                         |                                                  |                                  | Total genome sequences WGS+CP: \$77183                                           | Asymptomatic MRSA, per case, per case: \$418                                    |
|                         |                                                  |                                  | Screening positive, per unit: \$9                                                | MRSA-related treatment WGS, annual hospitalized cohort: \$2132431               |
|                         |                                                  |                                  | Screening negative, per unit: \$5                                                | Admission screening cost WGS+CP, annual hospitalized cohort: \$296419.          |
|                         |                                                  |                                  |                                                                                  | Outbreak investigation screening WGS+CP, annual hospitalized cohort: \$42237    |
|                         |                                                  |                                  | Total cost WSP+CP, annual hospitalized cohort: \$2545423                         |                                                                                 |

| Article                   |                                                                      |          | Unit Costs                                                         |                                                                   | Total costs                                                                                            |                                                                                |
|---------------------------|----------------------------------------------------------------------|----------|--------------------------------------------------------------------|-------------------------------------------------------------------|--------------------------------------------------------------------------------------------------------|--------------------------------------------------------------------------------|
|                           | Staff                                                                | Hospital | Test/intervention                                                  | Additional costs                                                  |                                                                                                        |                                                                                |
| <b>Gidengil, 2015[39]</b> | NS                                                                   | NS       | Active surveillance cultures test:<br>\$15                         | Clinical sampling WGS+CP, annual hospitalized cohort: \$554<br>NS | Active surveillance cultures testing plus selective decolonization, per 10000 patients (millions): \$6 |                                                                                |
|                           |                                                                      |          | Contact precautions per day:<br>\$146                              |                                                                   |                                                                                                        |                                                                                |
|                           |                                                                      |          | Chlorhexidine gluconate bath per day: \$13                         |                                                                   |                                                                                                        | Active surveillance cultures testing alone, per 10000 patients (millions): \$8 |
|                           |                                                                      |          | Decolonization (chlorhexidine gluconate + mupirocin) per day: \$27 |                                                                   |                                                                                                        | Universal contact precautions alone, per 10000 patients (millions): \$10       |
| <b>Ho, 2016[40]</b>       | ICU care, per day \$3362                                             | NS       | PCR : \$29                                                         | Adequate therapy for CRE infection: \$228                         | Active surveillance CRE-associated, cost per patient: \$1436                                           |                                                                                |
| <b>Hubben, 2011[41]</b>   | Take swab by nurse (5 min): \$4                                      |          | PCR- test cost, per sample: \$31                                   | Inadequate therapy for CRE infection: \$56                        | The investment costs of 'Selective Chromogenic' in a high prevalence setting (m): 11                   |                                                                                |
|                           | Clinical risk assessment by nurse (5 min): \$4                       |          | Chromogenic screening, per sample: \$5                             | Contact precautions material, per day: \$16                       |                                                                                                        |                                                                                |
|                           | PCR test cost lab. Technician time, per sample: \$1                  |          |                                                                    | Clearing of room (30 min): \$62                                   | The investment costs of 'Selective Chromogenic' in a medium prevalence setting (m): \$8                |                                                                                |
|                           | Chromogenic clinical lab. technician time, per sample: \$7           |          |                                                                    |                                                                   | The investment costs of 'Universal PCR' in a high prevalence setting (m): 21                           |                                                                                |
|                           | Contact precaution additional physician time (10 min), per day: \$18 |          |                                                                    |                                                                   | The investment costs of 'Universal PCR' in a medium prevalence setting (m): \$19                       |                                                                                |

| Article                        | Unit Costs                                                     |                                  |                                                                                                        | Additional costs                                                                          | Total costs                                                                                      |
|--------------------------------|----------------------------------------------------------------|----------------------------------|--------------------------------------------------------------------------------------------------------|-------------------------------------------------------------------------------------------|--------------------------------------------------------------------------------------------------|
|                                | Staff                                                          | Hospital                         | Test/intervention                                                                                      |                                                                                           |                                                                                                  |
| <b>Jayaraman, 2016[42]</b>     | Total cost nursing, General surgery ICU, per 6 weeks: \$116813 | NS                               | NS                                                                                                     | Overall excess costs, per 6 weeks: \$41790<br>Overall excess costs, per 6 weeks: \$195250 | Model program per year: \$83581                                                                  |
|                                | Staffing Surge pods, per 6 weeks: \$2126                       |                                  |                                                                                                        | Total Supply renewal, per 6 weeks: \$20042                                                |                                                                                                  |
|                                | Total cost nursing, General surgery ICU, per 1 week: \$19469   |                                  |                                                                                                        | Total Supply renewal, per 1 week: \$3218                                                  |                                                                                                  |
|                                | Staffing Surge pods, per 1 week: \$2126                        |                                  |                                                                                                        |                                                                                           |                                                                                                  |
| <b>Kang, 2012[43]</b>          | Registered Nurse, per hour: \$40                               | NS                               | Rapid PCR test: \$63                                                                                   | Contact precaution: gown, per unit: \$1                                                   | Universal screening strategy: \$10248049                                                         |
|                                | Physician, per hour: \$105                                     |                                  |                                                                                                        | Contact precaution: pair of gloves: \$0.1                                                 | Target screening strategy: \$8138164                                                             |
|                                |                                                                |                                  |                                                                                                        |                                                                                           | None screening strategy: \$8494454                                                               |
| <b>Lapointe-Shaw, 2017[44]</b> | NS                                                             | NS                               | Screening (PCR): \$37                                                                                  | Isolation, per day: \$40                                                                  | NS                                                                                               |
|                                |                                                                |                                  | Screening (swab and conventional culture plating): \$13                                                | Attributable cost of pneumonia: \$23912                                                   |                                                                                                  |
|                                |                                                                |                                  |                                                                                                        | Attributable cost of bloodstream infection: \$18400                                       |                                                                                                  |
|                                |                                                                |                                  |                                                                                                        | Attributable cost of urinary tract infection: \$3432                                      |                                                                                                  |
| <b>Lee, 2005[45]</b>           | Physician 'wages, per hour: \$270                              | Hospitalisation, per day: \$1610 | Screening, per patient admitted-with current screening practice: \$3.                                  | Isolation cart: \$273<br>Laboratory, per test: \$8                                        | Total cost per patient admitted with current screening practice: \$6816                          |
|                                | Healthcare workers' wages, per hour: \$38                      |                                  | Screening, per patient admitted-with current screening plus those with a history of renal disease: \$3 | Extra laboratory per positive results: \$11                                               | Total cost per patient with current screening plus those with a history of renal disease: \$7770 |

| Article                        | Unit Costs                                                                |                                                                                                  |                                                                                                                                                                      |                                                                                                                                                                                                                                                                                                   | Total costs                                                                                                                          |
|--------------------------------|---------------------------------------------------------------------------|--------------------------------------------------------------------------------------------------|----------------------------------------------------------------------------------------------------------------------------------------------------------------------|---------------------------------------------------------------------------------------------------------------------------------------------------------------------------------------------------------------------------------------------------------------------------------------------------|--------------------------------------------------------------------------------------------------------------------------------------|
|                                | Staff                                                                     | Hospital                                                                                         | Test/intervention                                                                                                                                                    | Additional costs                                                                                                                                                                                                                                                                                  |                                                                                                                                      |
| <b>Lee, 2009[46]</b>           | NS                                                                        | NS                                                                                               | Screening per patient admitted with current screening plus those with a hospitalisation in the previous 2-years: \$4.<br>Surveillance: \$12<br>Decolonization: \$131 | Wound infection (Hospitalization): \$5901<br><br>Graft infection (Hospitalization): \$16327<br><br>Amputation (hospitalization): \$15022<br><br>Infected stump (hospitalization): \$9814<br><br>Line infection (hospitalization): \$30972<br><br>Urinary tract infection (hospitalization): \$636 | Total cost per patient admitted with current screening plus those with a hospitalisation in the previous 2-years 1: \$6096<br><br>NS |
| <b>Lee, 2010[47]</b>           | NS                                                                        | Hospitalisation, per person (range); \$5335-\$30717                                              | Universal MRSA Surveillance testing (culture): \$13                                                                                                                  | Pneumonia (hospitalization): \$16439<br>Vancomycin; \$11<br><br>Extra procedures: blood cultures, cardiac surgery, placing patient in contact isolation.(range): \$40-\$8,835.                                                                                                                    | Total cost: \$7352                                                                                                                   |
| <b>Lin, 2021[48]</b>           | Staffing cost for implementing contact precautions, per patient/day: \$59 | The average cost for implementation electronic registry per CRE infection: \$32,923              | Total cost per active surveillance screening test (cultured-based screening): \$9<br>Total cost screening (cultured-based screening): \$12240                        | Implementation of the electronic registry, per hospital: \$10200<br>IPC bundle per CRE patient: \$652                                                                                                                                                                                             | The net cost of interventions: \$222360                                                                                              |
| <b>Luangasanatip, 2018[49]</b> | NS                                                                        | Paediatric ICU, per ward, per year: \$728<br><br>Base case, Adult ICU, per ward, per year: \$719 | NS                                                                                                                                                                   | Total cost hand hygiene (paediatric ICU), per year: \$763<br><br>Total cost hand hygiene (adult ICU), per year: \$814                                                                                                                                                                             | Baseline (hand hygiene compliance 10%) in paediatric ICU: \$34302013                                                                 |



| Article                 | Unit Costs                                                                    |                                                          |                                                                                                        |                                                                                                                                                | Total costs                                                        |
|-------------------------|-------------------------------------------------------------------------------|----------------------------------------------------------|--------------------------------------------------------------------------------------------------------|------------------------------------------------------------------------------------------------------------------------------------------------|--------------------------------------------------------------------|
|                         | Staff                                                                         | Hospital                                                 | Test/intervention                                                                                      | Additional costs                                                                                                                               |                                                                    |
|                         |                                                                               |                                                          |                                                                                                        |                                                                                                                                                | Hand hygiene compliance 20%, in pediatric ICU: \$34305035          |
|                         |                                                                               |                                                          |                                                                                                        |                                                                                                                                                | Hand hygiene compliance 40%, in pediatric ICU: \$34306617          |
|                         |                                                                               |                                                          |                                                                                                        |                                                                                                                                                | Hand hygiene compliance 60%, in pediatric ICU: \$34307083          |
|                         |                                                                               |                                                          |                                                                                                        |                                                                                                                                                | Baseline (hand hygiene compliance 10%) in Adult ICU: \$24366979    |
|                         |                                                                               |                                                          |                                                                                                        |                                                                                                                                                | Hand hygiene compliance 20%, in Adult ICU: \$24371521              |
|                         |                                                                               |                                                          |                                                                                                        |                                                                                                                                                | Hand hygiene compliance 40%, in Adult ICU: \$24373669              |
|                         |                                                                               |                                                          |                                                                                                        |                                                                                                                                                | Hand hygiene compliance 60%, in Adult ICU: \$24374285              |
| <b>Mac, 2019[50]</b>    | Nurse time, per test: \$6                                                     | Private room, daily: \$264                               | Rectal swab screen: \$3<br>Culture, positive test: \$19<br>Culture, negative test: \$8                 | Personal protective equipment, per room visit: \$2<br>Antibiotics, bacteraemia, per day: \$477<br>Antibiotics, other infections, per day: \$33 | NS                                                                 |
| <b>Murthy, 2010[51]</b> | NS                                                                            | Cost per surgical bed-day during the study period: \$265 | Decolonization treatment, mupirocin 2%: \$3<br>PCR screening: \$7<br>Standard chromogenic agar culture | Cost of standard chromogenic agar culture : \$7                                                                                                | No MRSA screening: \$1653<br>Universal rapid PCR screening: \$1676 |
| <b>Nelson, 2010[52]</b> | Total cost of extra nurse and physician time attributable to isolation: \$105 | NS                                                       | Screening: \$62<br>Decolonization: \$37                                                                | Isolation: \$594<br>Chlorhexidine showers: \$6                                                                                                 | NS                                                                 |

| Article                  | Unit Costs                                                                                                                                                                                     |          |                                                                                                                                                                                                    | Total costs                                                                                                                                                                                                                                                                |                                                                                                                   |
|--------------------------|------------------------------------------------------------------------------------------------------------------------------------------------------------------------------------------------|----------|----------------------------------------------------------------------------------------------------------------------------------------------------------------------------------------------------|----------------------------------------------------------------------------------------------------------------------------------------------------------------------------------------------------------------------------------------------------------------------------|-------------------------------------------------------------------------------------------------------------------|
|                          | Staff                                                                                                                                                                                          | Hospital | Test/intervention                                                                                                                                                                                  |                                                                                                                                                                                                                                                                            |                                                                                                                   |
|                          |                                                                                                                                                                                                |          |                                                                                                                                                                                                    | MRSA infection: \$24800<br>pair of gloves: \$9<br>gown: \$1                                                                                                                                                                                                                |                                                                                                                   |
| <b>Nelson, 2016[53]</b>  | NS                                                                                                                                                                                             | NS       | NS                                                                                                                                                                                                 | NS<br>Straight line assumption, Total (Overall costs): \$88053741                                                                                                                                                                                                          |                                                                                                                   |
| <b>Nelson, 2021[54]</b>  | Workload for nurses, per day: \$71<br><br>Workload for physicians, per day: \$9<br><br>workload for other hospital staff, per day: \$18<br><br>MRSA Prevention Coordinator, per year: \$ 28727 | NS       | Screening test, per patient: \$29<br><br>The total cost of screening on admission (millions): \$146                                                                                                | Isolation materials including gowns, gloves, surgical masks, goggles, and isolation laundry double bags, per day: \$47<br><br>Cleaning materials, per day: \$6<br><br>educational materials first year: \$ 6448<br><br>educational materials each subsequent year: \$ 1247 | Downward trend assumption<br>Total (Overall costs): \$59310260<br>NS                                              |
| <b>Penno, 2015[55]</b>   | Laboratory technician, per year: \$ 75179<br>Laboratory technician performing a human immunodeficiency virus, per hour: \$7                                                                    | NS       | Total Negative blood culture (reagent and supplies, indirect cost, equipment), per test: \$14<br><br>Total Positive blood culture (reagent and supplies, indirect cost, equipment), per test: \$88 | Additional cost, per patient: \$31                                                                                                                                                                                                                                         | Total cost generic antimicrobials, per case: \$16<br><br>Total cost evidence-based antimicrobials, per case: \$32 |
| <b>Puzniak, 2004[56]</b> | Nursing time to don and doff gowns, per day: \$63                                                                                                                                              | NS       | Vancomycin-resistant enterococci-negative test, per unit: \$17                                                                                                                                     | Gown, per day: \$106<br><br>Gloves, per day: \$10<br><br>Hand hygiene, per day: \$14                                                                                                                                                                                       | Total cost of policies. Gown period, for patient in ICU: \$380312                                                 |

| Article                   | Unit Costs |                                                                                       |                                                                    | Total costs                                                                                                                                                                                                                       |
|---------------------------|------------|---------------------------------------------------------------------------------------|--------------------------------------------------------------------|-----------------------------------------------------------------------------------------------------------------------------------------------------------------------------------------------------------------------------------|
|                           | Staff      | Hospital                                                                              | Test/intervention                                                  |                                                                                                                                                                                                                                   |
|                           |            |                                                                                       | Vancomycin-resistant enterococci positive test, per unit: \$34     | Total cost of policies. Annualized Gown period, for patient in ICU: \$ 253541                                                                                                                                                     |
| <b>Robotham, 2011[57]</b> | NS         | NS                                                                                    | Screening positive result: \$16<br>Screening negative result: \$10 | Total cost of policies. Non gown period, for patient in ICU: \$149208<br>No screening, per admission: \$23326                                                                                                                     |
|                           |            |                                                                                       |                                                                    | Contact precaution, general hospital: \$30<br>Decolonisation, general hospital: \$103                                                                                                                                             |
| <b>Robotham, 2016[58]</b> | NS         | Hospitalisation Bed (ICU and general ward), per day: \$581                            | Screening positive result: \$13<br>Screening negative result: \$7  | No screening, per admission: \$4552<br>High risk specialties, per admission: \$4618<br>Checklist activated, per admission: \$4686<br>High risk specialities +checklist activated, per admission: \$4719<br>All admissions: \$4807 |
|                           |            |                                                                                       |                                                                    | Treatment, 14 days: \$925                                                                                                                                                                                                         |
| <b>Voermans, 2019[59]</b> | NS         | Hospitalisation general ward, per day: \$1383<br>Hospitalisation ICU, per day: \$2061 | PCT test: \$102<br>CDI test: \$99                                  | All admissions + pre-emptive isolation: \$4812<br>NS                                                                                                                                                                              |
|                           |            |                                                                                       |                                                                    | Isolation, per day: \$54<br>Mechanical ventilation, per day: \$1143<br>Antibiotic, per day: \$184<br>Blood culture: \$47                                                                                                          |

| Article                      | Unit Costs                                                                                                                                                                            |                                                           |                                      |                                                                                                                                                                                                                                                                                               | Total costs                                                                      |
|------------------------------|---------------------------------------------------------------------------------------------------------------------------------------------------------------------------------------|-----------------------------------------------------------|--------------------------------------|-----------------------------------------------------------------------------------------------------------------------------------------------------------------------------------------------------------------------------------------------------------------------------------------------|----------------------------------------------------------------------------------|
|                              | Staff                                                                                                                                                                                 | Hospital                                                  | Test/intervention                    | Additional costs                                                                                                                                                                                                                                                                              |                                                                                  |
| <b>You, 2012[60]</b>         | NS                                                                                                                                                                                    | Neonatal intensive care unit care, per day: \$38          | Polymerase chain reaction: \$30      | NS                                                                                                                                                                                                                                                                                            | Active surveillance plus decolonization in Neonatal Intensive Care Unit: \$56280 |
| <b>You, 2018[61]</b>         | NS                                                                                                                                                                                    | ICU-acquired infection: \$57<br>ICU care, per day: \$3244 | Polymerase chain reaction test: \$30 | Oral gentamicin and colistin, per day: \$109                                                                                                                                                                                                                                                  | Active surveillance alone in Neonatal Intensive Care Unit: \$57157<br>NS         |
| <b>Zboromyrska, 2016[62]</b> | Technical staff (20 min per vial): \$12<br><br>Microbiologist (10 min per vial): \$12<br><br>Technical staff (15 min per sample): \$9<br><br>Microbiologist (10 min per sample): \$12 |                                                           | GeneXpert (per sample): \$115        | Empirical treatment for CRE infection, per day: \$233<br>Broad-spectrum antibiotic, per day: \$119<br><br>Narrow-spectrum antibiotic, per day: \$84<br><br>Central venous catheter (average): \$39<br><br>blood culture, per vial: \$26<br><br>PET: \$1202<br><br>Abdominal ultrasound: \$189 | GeneXpert and blood culture, per patient: \$707                                  |

Notes: Costs were calculated in 2022 USDs. NS, Not stated. ARO, Antibiotic-resistant organism. ASTs, Antimicrobial Stewardship Teams. ICU= Intensive care unit. BSI, bloodstream infection. CDI, Clostridium difficile infections. CRE, carbapenem-resistant Enterobacteriaceae. CP, Current practice. DPO, Dual priming oligonucleotide. H. pylori, *Helicobacter pylori*. IPC, infection prevention and control. MRSA, methicillin-resistant Staphylococcus aureus. PCR, polymerase chain reaction. PCT, Procalcitonin. RUT, rapid urease test. UE, Union European. US, United States. WGS, whole-genome sequencing. US, United States. EU, European Union. MRSA= Methicillin-resistant Staphylococcus aureus.

**Table SM10:** Quality appraisal using Drummond's checklist.

| First author                                                | Q1 | Q2 | Q3 | Q4 | Q5 | Q6 | Q7 | Q8 | Q9 | Q10 | Score     | Interpretation compared to studies' average score |
|-------------------------------------------------------------|----|----|----|----|----|----|----|----|----|-----|-----------|---------------------------------------------------|
| <b>I. Pharmaceutical interventions (N= 32 studies)</b>      |    |    |    |    |    |    |    |    |    |     |           |                                                   |
| Bianchini[3]                                                | 1  | 0  | 1  | 0  | 1  | 1  | 1  | 1  | 1  | 1   | <b>8</b>  | Average                                           |
| Bolaños-Diaz[4]                                             | 1  | 1  | 1  | 1  | 0  | 1  | 1  | 1  | 1  | 1   | <b>9</b>  | Above average                                     |
| Bounthavong[5]                                              | 1  | 1  | 1  | 1  | 0  | 1  | 0  | 1  | 1  | 1   | <b>8</b>  | Average                                           |
| Bounthavong[6]                                              | 1  | 1  | 1  | 1  | 1  | 0  | 0  | 1  | 1  | 1   | <b>8</b>  | Average                                           |
| Cara[7]                                                     | 1  | 1  | 0  | 1  | 1  | 0  | 0  | 1  | 1  | 0   | <b>6</b>  | Below average                                     |
| Collins[8]                                                  | 1  | 1  | 1  | 1  | 1  | 1  | 1  | 1  | 1  | 1   | <b>10</b> | Above average                                     |
| De Cock[9]                                                  | 1  | 1  | 0  | 0  | 1  | 1  | 0  | 1  | 1  | 1   | <b>7</b>  | Below average                                     |
| De Cock[10]                                                 | 1  | 1  | 1  | 0  | 1  | 0  | 0  | 1  | 1  | 1   | <b>7</b>  | Below average                                     |
| Goudarzi[11]                                                | 1  | 1  | 1  | 0  | 1  | 1  | 1  | 1  | 1  | 1   | <b>9</b>  | Above average                                     |
| Gutierrez[12]                                               | 1  | 1  | 1  | 1  | 0  | 1  | 1  | 1  | 1  | 0   | <b>8</b>  | Average                                           |
| Kong[13]                                                    | 1  | 1  | 1  | 1  | 1  | 1  | 1  | 1  | 1  | 1   | <b>10</b> | Above average                                     |
| Laohavaleeson[14]                                           | 1  | 1  | 1  | 1  | 1  | 1  | 0  | 1  | 1  | 1   | <b>9</b>  | Above average                                     |
| Lin[15]                                                     | 1  | 1  | 1  | 1  | 0  | 0  | 0  | 1  | 1  | 1   | <b>7</b>  | Below average                                     |
| McKinnon[16]                                                | 1  | 1  | 1  | 1  | 1  | 1  | 0  | 1  | 0  | 1   | <b>8</b>  | Average                                           |
| Mennini[17]                                                 | 1  | 1  | 1  | 1  | 0  | 1  | 1  | 1  | 1  | 1   | <b>9</b>  | Above average                                     |
| Mullins[18]                                                 | 1  | 1  | 1  | 1  | 0  | 0  | 0  | 1  | 0  | 1   | <b>6</b>  | Below average                                     |
| Niederman[19]                                               | 1  | 1  | 0  | 0  | 1  | 1  | 0  | 1  | 1  | 1   | <b>7</b>  | Below average                                     |
| Patel[20]                                                   | 1  | 1  | 1  | 1  | 1  | 1  | 0  | 1  | 1  | 0   | <b>8</b>  | Average                                           |
| Patel[21]                                                   | 1  | 1  | 1  | 1  | 1  | 1  | 0  | 1  | 1  | 1   | <b>9</b>  | Above average                                     |
| Prabhu[22]                                                  | 1  | 1  | 1  | 0  | 1  | 1  | 0  | 1  | 1  | 1   | <b>8</b>  | Average                                           |
| Rubio-Terres[23]                                            | 1  | 1  | 1  | 1  | 1  | 1  | 1  | 1  | 1  | 0   | <b>9</b>  | Above average                                     |
| Salas[24]                                                   | 1  | 1  | 1  | 1  | 0  | 0  | 0  | 1  | 1  | 1   | <b>7</b>  | Below average                                     |
| Schurmann[25]                                               | 1  | 1  | 1  | 1  | 0  | 1  | 0  | 1  | 1  | 1   | <b>8</b>  | Average                                           |
| Simon[26]                                                   | 1  | 1  | 1  | 1  | 1  | 1  | 1  | 1  | 1  | 1   | <b>10</b> | Above average                                     |
| Tan[27]                                                     | 1  | 1  | 1  | 0  | 0  | 0  | 0  | 1  | 1  | 1   | <b>6</b>  | Below average                                     |
| Varon[28]                                                   | 1  | 1  | 1  | 1  | 1  | 1  | 0  | 1  | 1  | 1   | <b>9</b>  | Above average                                     |
| Varon-Vega[29]                                              | 1  | 1  | 1  | 0  | 0  | 1  | 0  | 1  | 1  | 1   | <b>7</b>  | Below average                                     |
| Vlachaki[30]                                                | 1  | 1  | 1  | 1  | 1  | 1  | 1  | 1  | 1  | 1   | <b>10</b> | Above average                                     |
| Vu[31]                                                      | 1  | 1  | 1  | 1  | 1  | 1  | 0  | 1  | 1  | 1   | <b>9</b>  | Above average                                     |
| Von Dach[32]                                                | 1  | 1  | 1  | 1  | 1  | 1  | 0  | 1  | 1  | 1   | <b>9</b>  | Above average                                     |
| Wan[33]                                                     | 1  | 1  | 1  | 1  | 1  | 0  | 0  | 1  | 1  | 1   | <b>9</b>  | Above average                                     |
| Yang[34, 35]                                                | 1  | 1  | 1  | 1  | 1  | 1  | 1  | 1  | 1  | 0   | <b>9</b>  | Above average                                     |
| <b>II. Non-pharmaceutical interventions (N= 27 studies)</b> |    |    |    |    |    |    |    |    |    |     |           |                                                   |
| Brown[36]                                                   | 1  | 1  | 1  | 0  | 0  | 1  | 1  | 1  | 1  | 1   | <b>8</b>  | Average                                           |
| Cho[37]                                                     | 1  | 1  | 1  | 1  | 1  | 0  | 0  | 1  | 0  | 0   | <b>6</b>  | Below average                                     |
| Dymond[38]                                                  | 1  | 0  | 1  | 0  | 1  | 0  | 0  | 1  | 1  | 1   | <b>6</b>  | Below average                                     |
| Gidengil[39]                                                | 1  | 1  | 1  | 1  | 1  | 1  | 1  | 1  | 1  | 1   | <b>10</b> | Above average                                     |
| Ho[40]                                                      | 1  | 1  | 1  | 1  | 1  | 1  | 1  | 1  | 1  | 1   | <b>10</b> | Above average                                     |
| Hubben[41]                                                  | 1  | 1  | 1  | 1  | 1  | 0  | 1  | 1  | 1  | 1   | <b>9</b>  | Above average                                     |
| Jayaraman[42]                                               | 1  | 1  | 1  | 1  | 0  | 1  | 0  | 1  | 1  | 1   | <b>8</b>  | Average                                           |
| Kang[43]                                                    | 1  | 1  | 1  | 1  | 1  | 1  | 0  | 1  | 1  | 1   | <b>9</b>  | Above average                                     |
| Lapointe-Shaw[44]                                           | 1  | 1  | 1  | 1  | 0  | 1  | 1  | 1  | 1  | 0   | <b>8</b>  | Average                                           |
| Lee[45]                                                     | 1  | 0  | 1  | 0  | 1  | 0  | 0  | 1  | 1  | 1   | <b>6</b>  | Below average                                     |
| Lee[46]                                                     | 1  | 1  | 1  | 0  | 0  | 1  | 0  | 1  | 1  | 1   | <b>6</b>  | Below average                                     |
| Lee[47]                                                     | 1  | 1  | 1  | 1  | 0  | 1  | 1  | 1  | 1  | 0   | <b>8</b>  | Average                                           |
| Lin[48]                                                     | 1  | 1  | 1  | 0  | 1  | 0  | 0  | 1  | 1  | 1   | <b>7</b>  | Below average                                     |
| Luangasanatip[49]                                           | 1  | 1  | 1  | 1  | 1  | 1  | 1  | 1  | 1  | 1   | <b>10</b> | Above average                                     |

|                 |   |   |   |   |   |   |   |   |   |   |           |               |
|-----------------|---|---|---|---|---|---|---|---|---|---|-----------|---------------|
| Mac[50]         | 1 | 1 | 1 | 1 | 1 | 0 | 1 | 1 | 1 | 1 | <b>9</b>  | Above average |
| Murthy[51]      | 1 | 1 | 1 | 1 | 0 | 0 | 0 | 1 | 1 | 1 | <b>7</b>  | Below average |
| Nelson[52]      | 1 | 1 | 1 | 0 | 1 | 0 | 0 | 1 | 1 | 1 | <b>7</b>  | Below average |
| Nelson[53]      | 1 | 1 | 1 | 1 | 1 | 0 | 1 | 1 | 1 | 1 | <b>9</b>  | Above average |
| Nelson[54]      | 1 | 1 | 1 | 1 | 1 | 1 | 1 | 1 | 1 | 1 | <b>10</b> | Above average |
| Penno[55]       | 1 | 0 | 1 | 1 | 0 | 1 | 0 | 1 | 1 | 1 | <b>9</b>  | Above average |
| Puzniak[56]     | 1 | 1 | 1 | 1 | 0 | 0 | 0 | 1 | 1 | 1 | <b>7</b>  | Below average |
| Robotham[57]    | 1 | 1 | 1 | 1 | 0 | 1 | 0 | 1 | 1 | 1 | <b>8</b>  | Average       |
| Robotham[58]    | 1 | 1 | 1 | 1 | 1 | 1 | 0 | 1 | 1 | 1 | <b>9</b>  | Above average |
| Voermans[59]    | 1 | 1 | 1 | 0 | 1 | 0 | 0 | 1 | 1 | 1 | <b>7</b>  | Below average |
| You[60]         | 1 | 1 | 1 | 0 | 0 | 0 | 0 | 1 | 1 | 1 | <b>6</b>  | Below average |
| You[61]         | 1 | 1 | 1 | 1 | 0 | 1 | 1 | 1 | 1 | 1 | <b>9</b>  | Above average |
| Zboromyrska[62] | 1 | 1 | 1 | 0 | 0 | 1 | 1 | 1 | 1 | 1 | <b>9</b>  | Above average |

---

Average score among all studies 8.1

---

Percentage from the total 100 93 95 71 63 66 39 100 95 86

---

Notes: See Table SM5 for the full questions detailed. Q stands for question item from Drummond's checklist.[2, 64]

**Table SM11: Prisma Checklist[65]**

| Section and Topic       | Item # | Checklist item                                                                                                                                                                                                                                                                                        | Location where the item is reported |
|-------------------------|--------|-------------------------------------------------------------------------------------------------------------------------------------------------------------------------------------------------------------------------------------------------------------------------------------------------------|-------------------------------------|
| <b>TITLE</b>            |        |                                                                                                                                                                                                                                                                                                       |                                     |
| Title                   | 1      | Identify the report as a systematic review.                                                                                                                                                                                                                                                           | Title, first page                   |
| <b>ABSTRACT</b>         |        |                                                                                                                                                                                                                                                                                                       |                                     |
| Abstract                | 2      | See the PRISMA 2020 for Abstracts checklist.                                                                                                                                                                                                                                                          | Abstract, first page                |
| <b>INTRODUCTION</b>     |        |                                                                                                                                                                                                                                                                                                       |                                     |
| Rationale               | 3      | Describe the rationale for the review in the context of existing knowledge.                                                                                                                                                                                                                           | Introduction                        |
| Objectives              | 4      | Provide an explicit statement of the objective(s) or question(s) the review addresses.                                                                                                                                                                                                                | Introduction, last paragraph        |
| <b>METHODS</b>          |        |                                                                                                                                                                                                                                                                                                       |                                     |
| Eligibility criteria    | 5      | Specify the inclusion and exclusion criteria for the review and how studies were grouped for the syntheses.                                                                                                                                                                                           | Methods, third paragraph            |
| Information sources     | 6      | Specify all databases, registers, websites, organisations, reference lists, and other sources searched or consulted to identify studies. Specify the date when each source was last searched or consulted.                                                                                            | Methods, third paragraph            |
| Search strategy         | 7      | Present the full search strategies for all databases, registers and websites, including any filters and limits used.                                                                                                                                                                                  | Supplementary material, Table SM2   |
| Selection process       | 8      | Specify the methods used to decide whether a study met the inclusion criteria of the review, including how many reviewers screened each record and each report retrieved, whether they worked independently, and, if applicable, details of automation tools used in the process.                     | Methods, paragraphs 3 and 4.        |
| Data collection process | 9      | Specify the methods used to collect data from reports, including how many reviewers collected data from each report, whether they worked independently, any processes for obtaining or confirming data from study investigators, and, if applicable, details of automation tools used in the process. | Methods, paragraph 5.               |
| Data items              | 10a    | List and define all outcomes for which data were sought. Specify whether all results that were compatible with each outcome domain in each study were sought (e.g., for all measures, time points, analyses), and if not, the methods used to decide which results to collect.                        | Methods, paragraph 5.               |
|                         | 10b    | List and define all other variables for which                                                                                                                                                                                                                                                         | Methods, paragraph 5.               |

| Section and Topic             | Item # | Checklist item                                                                                                                                                                                                                                                        | Location where the item is reported |
|-------------------------------|--------|-----------------------------------------------------------------------------------------------------------------------------------------------------------------------------------------------------------------------------------------------------------------------|-------------------------------------|
|                               |        | data were sought (e.g., participant and intervention characteristics, funding sources). Describe any assumptions made about any missing or unclear information.                                                                                                       |                                     |
| Study risk of bias assessment | 11     | Specify the methods used to assess the risk of bias in the included studies, including details of the tool(s) used, how many reviewers assessed each study and whether they worked independently, and if applicable, details of automation tools used in the process. | Methods, paragraph 6.               |
| Effect measures               | 12     | Specify for each outcome the effect measure(s) (e.g., risk ratio, mean difference) used in synthesizing or presenting results.                                                                                                                                        | Methods, paragraph 5.               |
| Synthesis methods             | 13a    | Describe the processes used to decide which studies were eligible for each synthesis (e.g., tabulating the study intervention characteristics and comparing against the planned groups for each synthesis (item #5)).                                                 | Methods, paragraph 4.               |
|                               | 13b    | Describe any methods required to prepare the data for presentation or synthesis, such as handling of missing summary statistics, or data conversions.                                                                                                                 | Methods, paragraph 5.               |
|                               | 13c    | Describe any methods used to tabulate or visually display the results of individual studies and syntheses.                                                                                                                                                            | Methods, paragraph 5.               |
|                               | 13d    | Describe any methods used to synthesize results and provide a rationale for the choice(s). If meta-analysis was performed, describe the model(s), method(s) to identify the presence and extent of statistical heterogeneity, and software package(s) used.           | Methods, paragraph 5.               |
|                               | 13e    | Describe any methods to explore possible causes of heterogeneity among study results (e.g., subgroup analysis, meta-regression).                                                                                                                                      | Methods, paragraph 5.               |
|                               | 13f    | Describe any sensitivity analyses conducted to assess the robustness of the synthesized results.                                                                                                                                                                      | Methods, paragraph 5.               |
| Reporting bias assessment     | 14     | Describe any methods used to assess bias risk due to missing synthesis results (arising from reporting biases).                                                                                                                                                       | Methods, paragraph 6.               |
| Certainty assessment          | 15     | Describe any methods used to assess certainty (or confidence) in the body of evidence for an outcome.                                                                                                                                                                 | Methods, paragraph 6.               |
| <b>RESULTS</b>                |        |                                                                                                                                                                                                                                                                       |                                     |
| Study selection               | 16a    | Describe the search and selection process                                                                                                                                                                                                                             | Results, first paragraph            |



| Section and Topic             | Item # | Checklist item                                                                                                                                                                                                                                                                        | Location where the item is reported                                  |
|-------------------------------|--------|---------------------------------------------------------------------------------------------------------------------------------------------------------------------------------------------------------------------------------------------------------------------------------------|----------------------------------------------------------------------|
|                               |        | results, from the number of records identified in the search to the number of studies included in the review, ideally using a flow diagram.                                                                                                                                           |                                                                      |
|                               | 16b    | Cite studies that might appear to meet the inclusion criteria but which were excluded, and explain why they were excluded.                                                                                                                                                            | Results, first paragraph, and PRISMA chart                           |
| Study characteristics         | 17     | Cite each included study and present its characteristics.                                                                                                                                                                                                                             | Supplementary Material                                               |
| Risk of Bias in studies       | 18     | Present assessments of risk of bias for each included study.                                                                                                                                                                                                                          | Supplementary Material and the last paragraph of the Results section |
| Results of individual studies | 19     | For all outcomes, present, for each study: (a) summary statistics for each group (where appropriate) and (b) an effect estimate and its precision (e.g., confidence/credible interval), ideally using structured tables or plots.                                                     | Results                                                              |
| Results of syntheses          | 20a    | For each synthesis, briefly summarise the characteristics and risk of bias among contributing studies.                                                                                                                                                                                | Last paragraph of the Results section                                |
|                               | 20b    | Present results of all statistical syntheses conducted. If meta-analysis was done, present for each the summary estimate and its precision (e.g., confidence/credible interval) and measures of statistical heterogeneity. If comparing groups, describe the direction of the effect. | n/a                                                                  |
|                               | 20c    | Present results of all investigations of possible causes of heterogeneity among study results.                                                                                                                                                                                        | Supplementary material                                               |
|                               | 20d    | Present results of all sensitivity analyses conducted to assess the robustness of the synthesized results.                                                                                                                                                                            | n/a                                                                  |
| Reporting biases              | 21     | Present assessments of risk of bias due to missing results (arising from reporting biases) for each synthesis assessed.                                                                                                                                                               | Last paragraph of the Results section                                |
| Certainty of evidence         | 22     | Present assessments of certainty (or confidence) in the body of evidence for each outcome assessed.                                                                                                                                                                                   | n/a                                                                  |
| <b>DISCUSSION</b>             |        |                                                                                                                                                                                                                                                                                       |                                                                      |
| Discussion                    | 23a    | Provide a general interpretation of the results in the context of other evidence.                                                                                                                                                                                                     | Discussion section                                                   |
|                               | 23b    | Discuss any limitations of the evidence included in the review.                                                                                                                                                                                                                       | Discussion section                                                   |
|                               | 23c    | Discuss any limitations of the review processes used.                                                                                                                                                                                                                                 | Discussion section                                                   |

| Section and Topic                               | Item # | Checklist item                                                                                                                                                                                                                                 | Location where the item is reported                                                                                 |
|-------------------------------------------------|--------|------------------------------------------------------------------------------------------------------------------------------------------------------------------------------------------------------------------------------------------------|---------------------------------------------------------------------------------------------------------------------|
|                                                 | 23d    | Discuss the implications of the results for practice, policy, and future research.                                                                                                                                                             | Discussion section                                                                                                  |
| <b>OTHER INFORMATION</b>                        |        |                                                                                                                                                                                                                                                |                                                                                                                     |
| Registration and protocol                       | 24a    | Provide registration information for the review, including the register name and registration number, or state that the review was not registered.                                                                                             | Methods section, Prospero registration                                                                              |
|                                                 | 24b    | Indicate where the review protocol can be accessed, or state that a protocol was not prepared.                                                                                                                                                 | Prospero protocol prepared                                                                                          |
|                                                 | 24c    | Describe and explain any amendments to information provided at registration or in the protocol.                                                                                                                                                | n/a                                                                                                                 |
| Support                                         | 25     | Describe sources of financial or non-financial support for the review, and the role of the funders or sponsors in the review.                                                                                                                  | n/a                                                                                                                 |
| Competing interests                             | 26     | Declare any competing interests of review authors.                                                                                                                                                                                             | n/a                                                                                                                 |
| Availability of data, code, and other materials | 27     | The report which of the following are publicly available and where they can be found: template data collection forms; data extracted from included studies; data used for all analyses; analytic code; any other materials used in the review. | Data are provided in Excel ( <a href="https://bit.ly/SR_amrCEingredients">https://bit.ly/SR_amrCEingredients</a> ). |

Notes: n/a= not applicable.

## References

1. Tacconelli E, Carrara E, Savoldi A, Harbarth S, Mendelson M, Monnet DL, et al. Discovery, research, and development of new antibiotics: the WHO priority list of antibiotic-resistant bacteria and tuberculosis. *Lancet Infect Dis*. 2018;18(3):318-27. Epub 2017/12/26. doi: 10.1016/s1473-3099(17)30753-3. PubMed PMID: 29276051.
2. Drummond MF, Sculpher MJ, Claxton K, Stoddart GL, Torrance GW. *Methods for the Economic Evaluation of Health Care Programmes*. Oxford: Oxford: Oxford University Press; 2015.
3. Bianchini ML, Jeffres MN, Campbell JD. Cost-Effectiveness Analysis of New Beta-Lactam Beta-Lactamase Inhibitor Antibiotics Versus Colistin for the Treatment of Carbapenem-Resistant Infections. *Hospital Pharmacy*. 2022;57(1):93-100.
4. Bolaños-Díaz R, Angles-Yanqui E, Pérez-Lazo G, Sanabria-Montañez C. Cost-effectiveness of ceftazidime/avibactam for infections due to carbapenem-resistant bacteria in Peru. *Journal of Pharmaceutical Health Services Research*. 2022;13(1):2-8.
5. Bounthavong M, Hsu D, Okamoto M. Cost-effectiveness analysis of linezolid vs. vancomycin in treating methicillin-resistant *Staphylococcus aureus* complicated skin and soft tissue infections using a decision analytic model. *International journal of clinical practice*. 2009;63(3):376-86.
6. Bounthavong M, Zargarzadeh A, Hsu DI, Vanness DJ. Cost-effectiveness analysis of linezolid, daptomycin, and vancomycin in methicillin-resistant *Staphylococcus aureus*: complicated skin and skin structure infection using Bayesian methods for evidence synthesis. *Value in Health*. 2011;14(5):631-9.
7. Cara AKS, Zaidi STR, Suleman F. Cost-effectiveness analysis of low versus high dose colistin in the treatment of multi-drug resistant pneumonia in Saudi Arabia. *International Journal of Clinical Pharmacy*. 2018;40:1051-8.
8. Collins CD, Schwemm AK. Linezolid versus vancomycin in the empiric treatment of nosocomial pneumonia: a cost-utility analysis incorporating results from the ZEPHYR trial. *Value in health*. 2015;18(5):614-21.
9. De Cock E, Sorensen S, Levrat F, Besnier JM, Dupon M, Guery B, et al. Cost-effectiveness of linezolid versus vancomycin for hospitalized patients with complicated skin and soft-tissue infections in France. *Med Mal Infect*. 2009;39(5):330-40. doi: <https://dx.doi.org/10.1016/j.medmal.2009.01.005>. PubMed PMID: 19304423.
10. De Cock E, Krueger WA, Sorensen S, Baker T, Hardewig J, Duttagupta S, et al. Cost-effectiveness of linezolid vs vancomycin in suspected methicillin-resistant *Staphylococcus aureus* nosocomial pneumonia in Germany. *Infection*. 2009;37(2):123-32. doi: <https://dx.doi.org/10.1007/s15010-008-8046-7>. PubMed PMID: 19277465.
11. Goudarzi Z, Danayi F, Keshavarz K, Gholami A. Cost-effectiveness analysis of ceftazidime avibactam versus colistin in carbapenem-resistant enterobacteriaceae in Iran. *Cost Effectiveness and Resource Allocation*. 2023;21(1):45.
12. Gutiérrez A, Fandino C. Cost-effectiveness of ceftazidime/avibactam versus colistin+ meropenem for treatment of carbapenemic-resistant enterobacteria infections in Chile. *Revista Chilena de Infectología: Organo Oficial de la Sociedad Chilena de Infectología*. 2021;38(1):7-14.

13. Kong W, Yang X, Shu Y, Li S, Song B, Yang K. Cost-effectiveness analysis of ceftazidime-avibactam as definitive treatment for treatment of carbapenem-resistant *Klebsiella pneumoniae* bloodstream infection. *Frontiers in Public Health*. 2023;11:1118307.
14. Laohavaleeson S, Barriere SL, Nicolau DP, Kuti JL. Cost-effectiveness of telavancin versus vancomycin for treatment of complicated skin and skin structure infections. *Pharmacotherapy*. 2008;28(12):1471-82. doi: <https://dx.doi.org/10.1592/phco.28.12.1471>. PubMed PMID: 19025428.
15. Lin P-C, Wang BC, Kim R, Magyar A, Lai C-C, Yang Y-W, et al. Estimating the cost-effectiveness of linezolid for the treatment of methicillin-resistant *Staphylococcus aureus* nosocomial pneumonia in Taiwan. *Journal of Microbiology, Immunology and Infection*. 2016;49(1):46-51.
16. McKinnon PS, Sorensen SV, Liu LZ, Itani KM. Impact of linezolid on economic outcomes and determinants of cost in a clinical trial evaluating patients with MRSA complicated skin and soft-tissue infections. *Ann Pharmacother*. 2006;40(6):1017-23. PubMed PMID: 16720705.
17. Mennini FS, Gori M, Vlachaki I, Fiorentino F, Malfa PL, Urbinati D, et al. Cost-effectiveness analysis of Vaborem in Carbapenem-resistant Enterobacterales (CRE)-*Klebsiella pneumoniae* infections in Italy. *Health Economics Review*. 2021;11(1):1-10.
18. Daniel Mullins C, Kuznik A, Shaya FT, Obeidat NA, Levine AR, Liu LZ, et al. Cost-effectiveness analysis of linezolid compared with vancomycin for the treatment of nosocomial pneumonia caused by methicillin-resistant *Staphylococcus aureus*. *Clin Ther*. 2006;28(8):1184-98. doi: <https://dx.doi.org/10.1016/j.clinthera.2006.08.016>. PubMed PMID: 16982296.
19. Niederman MS, Chastre J, Solem CT, Wan Y, Gao X, Myers DE, et al. Health economic evaluation of patients treated for nosocomial pneumonia caused by methicillin-resistant *Staphylococcus aureus*: secondary analysis of a multicenter randomized clinical trial of vancomycin and linezolid. *Clin Ther*. 2014;36(9):1233-43.e1. doi: <https://dx.doi.org/10.1016/j.clinthera.2014.06.029>. PubMed PMID: 25066668.
20. Patel DA, Michel A, Stephens J, Weber B, Petrik C, Charbonneau C. An economic model to compare linezolid and vancomycin for the treatment of confirmed methicillin-resistant *Staphylococcus aureus* nosocomial pneumonia in Germany. *Infect*. 2014;7:273-80. doi: <https://dx.doi.org/10.2147/IDR.S68658>. PubMed PMID: 25368526.
21. Patel DA, Shorr AF, Chastre J, Niederman M, Simor A, Stephens JM, et al. Modeling the economic impact of linezolid versus vancomycin in confirmed nosocomial pneumonia caused by methicillin-resistant *Staphylococcus aureus*. *Critical Care (London, England)*. 2014;18(4):R157. PubMed PMID: rayyan-844244224.
22. Prabhu V, Foo J, Ahir H, Sarpong E, Merchant S. Cost-effectiveness of ceftolozane/tazobactam plus metronidazole compared with piperacillin/tazobactam as empiric therapy for the treatment of complicated intra-abdominal infections based on the in-vitro surveillance of bacterial isolates in the UK. *J Med Econ*. 2017;20(8):840-9. doi: <https://dx.doi.org/10.1080/13696998.2017.1333960>. PubMed PMID: 28532194.
23. Terrés CR, Rodríguez DR, Oró NM, Grau S. Análisis farmacoeconómico del tratamiento de la bacteriemia por *Staphylococcus aureus* resistente a metilicina con daptomicina y vancomicina. *Revista Española de Quimioterapia*. 2012;25(4):283-92.
24. del Diego Salas J, Orly de Labry Lima A, Espin Balbino J, Bermudez Tamayo C, Fernandez-Crehuet Navajas J. An economic evaluation of two interventions for the prevention of post-surgical infections in cardiac surgery. *Rev*. 2016;31(1):27-33. doi: <https://dx.doi.org/10.1016/j.cali.2015.08.007>. PubMed PMID: 26602758.

25. Schurmann D, Sorensen SV, De Cock E, Duttagupta S, Resch A. Cost-effectiveness of linezolid versus vancomycin for hospitalised patients with complicated skin and soft-tissue infections in Germany. *Eur J Health Econ.* 2009;10(1):65-79. doi: <https://dx.doi.org/10.1007/s10198-008-0104-7>. PubMed PMID: 18437437.
26. Simon M, Sfeir MM, Calfee DP, Satlin MJ. Cost-effectiveness of ceftazidime-avibactam for treatment of carbapenem-resistant Enterobacteriaceae bacteremia and pneumonia. *Antimicrobial Agents and Chemotherapy.* 2019;63(12):10.1128/aac.00897-19.
27. Tan SC, Wang X, Wu B, Kang H, Li Q, Chen Y, et al. Cost-effectiveness of linezolid versus vancomycin among patients with methicillin-resistant *Staphylococcus aureus* confirmed nosocomial pneumonia in China. *Value in Health Regional Issues.* 2014;3:94-100.
28. Varón F, Londoño D, Álvarez C, Taborda A, Prieto V. Costo-efectividad de linezolid comparado con vancomicina en el manejo de la neumonía asociada a ventilación mecánica en Colombia. *Infectio.* 2014;18(4):143-52.
29. Varón-Vega F, Lemos E, Castaño GN, Reyes J. Cost-utility analysis of ceftazidime-avibactam versus colistin-meropenem in the treatment of infections due to Carbapenem-resistant *Klebsiella pneumoniae* in Colombia. *Expert Review of Pharmacoeconomics & Outcomes Research.* 2022;22(2):235-40.
30. Vlachaki I, Zinzi D, Falla E, Mantopoulos T, Guy H, Jandu J, et al. Cost-effectiveness analysis of vaborem for the treatment of carbapenem-resistant Enterobacteriaceae-*Klebsiella pneumoniae* carbapenemase (CRE-KPC) infections in the UK. *The European Journal of Health Economics.* 2021:1-13.
31. Vu M, Smith KJ, Aspinall SL, Clancy CJ, Buehrle DJ. Exploratory cost-effectiveness analysis for treatment of methicillin-resistant *Staphylococcus aureus* bloodstream infections: is linezolid or daptomycin favored over vancomycin? *Clinical Drug Investigation.* 2021;41:885-94.
32. Von Dach E, Morel C, Murthy A, Pagani L, Macedo-Vinas M, Olearo F, et al. Comparing the cost-effectiveness of linezolid to trimethoprim/sulfamethoxazole plus rifampicin for the treatment of methicillin-resistant *Staphylococcus aureus* infection: a healthcare system perspective. *Clinical Microbiology and Infection.* 2017;23(9):659-66.
33. Wan Y, Li Q, Chen Y, Haider S, Liu S, Gao X. Economic evaluation among Chinese patients with nosocomial pneumonia caused by methicillin-resistant *Staphylococcus aureus* and treated with linezolid or vancomycin: a secondary, post-hoc analysis based on a phase 4 clinical trial study. *J Med Econ.* 2016;19(1):53-62.
34. Yang J, Naik J, Massello M, Ralph L, Dillon RJ. Cost-Effectiveness of Imipenem/Cilastatin/Relebactam Compared with Colistin in Treatment of Gram-Negative Infections Caused by Carbapenem-Non-Susceptible Organisms. *Infectious Diseases & Therapy.* 2022;25:25. doi: <https://dx.doi.org/10.1007/s40121-022-00607-x>. PubMed PMID: 35334080.
35. Yang J, Naik J, Massello M, Ralph L, Dillon RJ. Correction to: Cost-Effectiveness of Imipenem/Cilastatin/Relebactam Compared with Colistin in Treatment of Gram-Negative Infections Caused by Carbapenem-Non-Susceptible Organisms. *Infectious Diseases and Therapy.* 2022;11(4):1459.
36. Brown J, Paladino JA. Impact of rapid methicillin-resistant *Staphylococcus aureus* polymerase chain reaction testing on mortality and cost effectiveness in hospitalized patients with bacteraemia. *Pharmacoeconomics.* 2010;28(7):567-75.

37. Cho JH, Jeon SR, Kim HG, Jin SY, Park S. Cost-effectiveness of a tailored *Helicobacter pylori* eradication strategy based on the presence of a 23 S ribosomal RNA point mutation that causes clarithromycin resistance in Korean patients. *Journal of gastroenterology and hepatology*. 2019;34(4):700-6.
38. Dymond A, Davies H, Mealing S, Pollit V, Coll F, Brown NM, et al. Genomic surveillance of methicillin-resistant *Staphylococcus aureus*: a mathematical early modeling study of cost-effectiveness. *Clin Infect Dis*. 2020;70(8):1613-9.
39. Gidengil CA, Gay C, Huang SS, Platt R, Yokoe D, Lee GM. Cost-effectiveness of strategies to prevent methicillin-resistant *Staphylococcus aureus* transmission and infection in an intensive care unit. *infection control & hospital epidemiology*. 2015;36(1):17-27.
40. Ho K-w, Ng W-t, Ip M, You JH. Active surveillance of carbapenem-resistant Enterobacteriaceae in intensive care units: Is it cost-effective in a nonendemic region? *Am J Infect Control*. 2016;44(4):394-9.
41. Hubben G, Bootsma M, Luteijn M, Glynn D, Bishai D, Bonten M, et al. Modelling the costs and effects of selective and universal hospital admission screening for methicillin-resistant *Staphylococcus aureus*. *PloS one*. 2011;6(3):e14783.
42. Jayaraman SP, Jiang Y, Resch S, Askari R, Klompas M. Cost-effectiveness of a model infection control program for preventing multi-drug-resistant organism infections in critically ill surgical patients. *Surgical Infections*. 2016;17(5):589-95.
43. Kang J, Mandsager P, Biddle AK, Weber DJ. Cost-effectiveness analysis of active surveillance screening for methicillin-resistant *Staphylococcus aureus* in an academic hospital setting. *Infection Control & Hospital Epidemiology*. 2012;33(5):477-86.
44. Lapointe-Shaw L, Voruganti T, Kohler P, Thein H-H, Sander B, McGeer A. Cost-effectiveness analysis of universal screening for carbapenemase-producing Enterobacteriaceae in hospital inpatients. *European Journal of Clinical Microbiology & Infectious Diseases*. 2017;36(6):1047-55.
45. Lee TA, Hacek DM, Stroupe KT, Collins SM, Peterson LR. Three surveillance strategies for vancomycin-resistant enterococci in hospitalized patients: detection of colonization efficiency and a cost-effectiveness model. *Infection Control & Hospital Epidemiology*. 2005;26(1):39-46.
46. Lee BY, Tsui BY, Bailey RR, Smith KJ, Muder RR, Lewis GJ, et al. Should vascular surgery patients be screened preoperatively for methicillin-resistant *Staphylococcus aureus*? *Infection Control & Hospital Epidemiology*. 2009;30(12):1158-65.
47. Lee BY, Bailey RR, Smith KJ, Muder RR, Strotmeyer ES, Lewis GJ, et al. Universal methicillin-resistant *Staphylococcus aureus* (MRSA) surveillance for adults at hospital admission: an economic model and analysis. *Infection Control & Hospital Epidemiology*. 2010;31(6):598-606.
48. Lin G, Tseng KK, Gatalo O, Martinez DA, Hinson JS, Milstone AM, et al. Cost-effectiveness of carbapenem-resistant Enterobacteriaceae (CRE) surveillance in Maryland. *Infection Control & Hospital Epidemiology*. 2021:1-9.
49. Luangasanatip N, Hongsuwan M, Lubell Y, Limmathurotsakul D, Srisamang P, Day N, et al. Cost-effectiveness of interventions to improve hand hygiene in healthcare workers in middle-income hospital settings: a model-based analysis. *J Hosp Infect*. 2018;100(2):165-75.

50. Mac S, Fitzpatrick T, Johnstone J, Sander B. Vancomycin-resistant enterococci (VRE) screening and isolation in the general medicine ward: a cost-effectiveness analysis. *Antimicrobial Resistance & Infection Control*. 2019;8(1):1-10.
51. Murthy A, De Angelis G, Pittet D, Schrenzel J, Uckay I, Harbarth S. Cost-effectiveness of universal MRSA screening on admission to surgery. *Clinical microbiology and infection*. 2010;16(12):1747-53.
52. Nelson R, Samore M, Smith K, Harbarth S, Rubin M, Program CPE. Cost-effectiveness of adding decolonization to a surveillance strategy of screening and isolation for methicillin-resistant *Staphylococcus aureus* carriers. *Clinical microbiology and infection*. 2010;16(12):1740-6.
53. Nelson RE, Stevens VW, Khader K, Jones M, Samore MH, Evans ME, et al. Economic analysis of Veterans Affairs initiative to prevent methicillin-resistant *Staphylococcus aureus* infections. *American journal of preventive medicine*. 2016;50(5):S58-S65.
54. Nelson RE, Goto M, Samore MH, Jones M, Stevens VW, Evans ME, et al. Expanding an economic evaluation of the Veterans Affairs (VA) methicillin-resistant *Staphylococcus aureus* (MRSA) prevention initiative to include prevention of infections from other pathogens. *Clin Infect Dis*. 2021;72(Supplement\_1):S50-S8.
55. Penno EC, Baird SJ, Crump JA. Cost-effectiveness of surveillance for bloodstream infections for sepsis management in low-resource settings. *The American Journal of Tropical Medicine and Hygiene*. 2015;93(4):850.
56. Puzniak LA, Gillespie KN, Leet T, Kollef M, Mundy LM. A Cost-Benefit Analysis of Gown Use in Controlling Vancomycin-Resistant Enterococcus Transmission Is It Worth the Price? *Infection Control & Hospital Epidemiology*. 2004;25(5):418-24.
57. Robotham JV, Graves N, Cookson BD, Barnett AG, Wilson JA, Edgeworth JD, et al. Screening, isolation, and decolonisation strategies in the control of methicillin resistant *Staphylococcus aureus* in intensive care units: cost effectiveness evaluation. *Bmj*. 2011;343.
58. Robotham JV, Deeny SR, Fuller C, Hopkins S, Cookson B, Stone S. Cost-effectiveness of national mandatory screening of all admissions to English National Health Service hospitals for methicillin-resistant *Staphylococcus aureus*: a mathematical modelling study. *The Lancet Infectious Diseases*. 2016;16(3):348-56.
59. Voermans AM, Mewes JC, Broyles MR, Steuten LM. Cost-effectiveness analysis of a procalcitonin-guided decision algorithm for antibiotic stewardship using real-world US hospital data. *Omic: a journal of integrative biology*. 2019;23(10):508-15.
60. You JH, Chan C, Wong M, Ip M. Active surveillance and decolonization of methicillin-resistant *Staphylococcus aureus* on admission to neonatal intensive care units in Hong Kong: a cost-effectiveness analysis. *Infection Control & Hospital Epidemiology*. 2012;33(10):1024-30.
61. You JH, Li H-k, Ip M. Surveillance-guided selective digestive decontamination of carbapenem-resistant Enterobacteriaceae in the intensive care unit: A cost-effectiveness analysis. *Am J Infect Control*. 2018;46(3):291-6.
62. Zboromyrska Y, De la Calle C, Soto M, Sampietro-Colom L, Soriano A, Alvarez-Martínez MJ, et al. Rapid diagnosis of staphylococcal catheter-related bacteraemia in direct blood samples by real-time PCR. *PLoS One*. 2016;11(8):e0161684.
63. Online RB. IBM Micromedex [database online]. 2020.

64. Drummond MF, O'Brien BJ, Torrance GW, Stoddart GL. *Methods for the Economic Evaluation of Health Care Programmes*. Oxford: Oxford University Press; 1997.
65. Page MJ, McKenzie JE, Bossuyt PM, Boutron I, Hoffmann TC, Mulrow CD, et al. The PRISMA 2020 statement: an updated guideline for reporting systematic reviews. *BMJ*. 2021;372:n71. doi: 10.1136/bmj.n71.
